# Supplementary material for: Evaluating the Use of ABBA–BABA Statistics to Locate Introgressed Loci
Source: PubMed Central journal article supplement (PMC4271521; doi:10.1093/molbev/msu269), 2014-09-22
Supplement: supp_msu269_Martin_Davey_Jiggins_Supplementary_Information.pdf [file supp_msu269_Martin_Davey_Jiggins_Supplementary_Information.pdf]

## **Supplementary Information**

### **Evaluating the use of ABBA-BABA statistics to locate introgressed loci**

Simon H. Martin, John W. Davey, Chris D. Jiggins

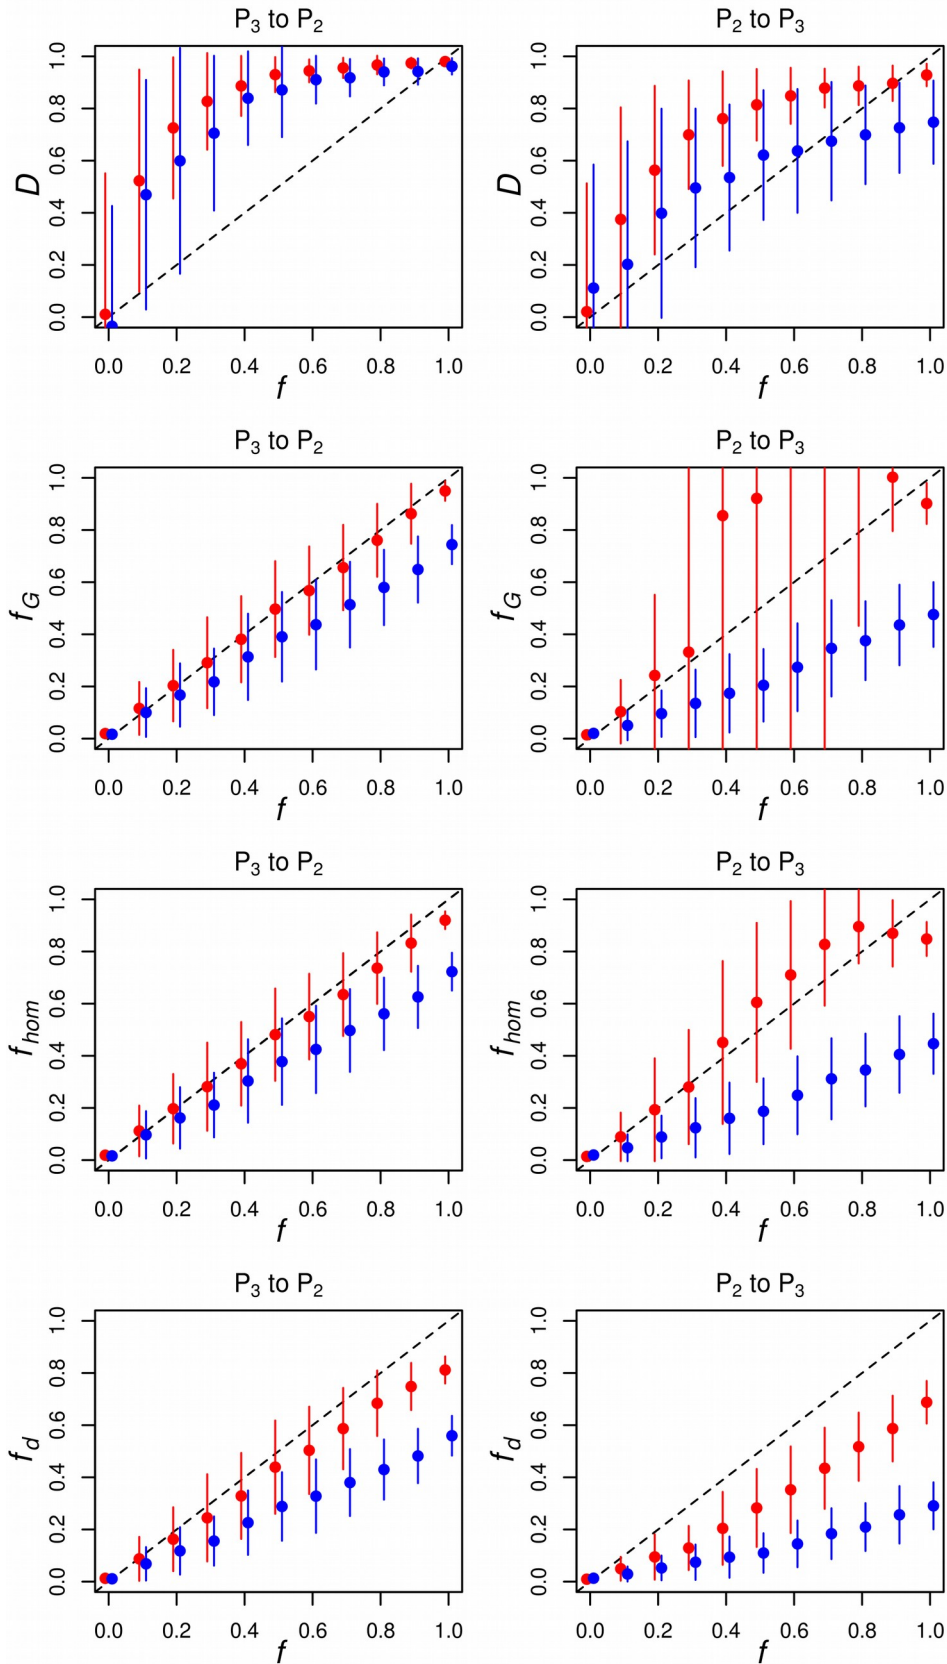

**Figure S1 Comparing statistics to detect and quantify introgression (A)** window = 5 kb,  $4Nr = 0.01$   
 Plots show means and standard deviations for  $D$  and  $f$  estimators, calculated over 100 simulated sequences (See Methods for details). Simulations covered 11 different values of  $f$ , the proportion of introgression. Gene flow was simulated either from P<sub>3</sub> to P<sub>2</sub> (conventional model, left-hand column) or from P<sub>2</sub> to P<sub>3</sub> (right-hand

column). Dashed diagonal lines show the expectation of a perfect estimator of  $f$ . Two times of gene flow are shown: 0.1 (red) and 0.5 (blue)  $\times 4N$  generations ago.

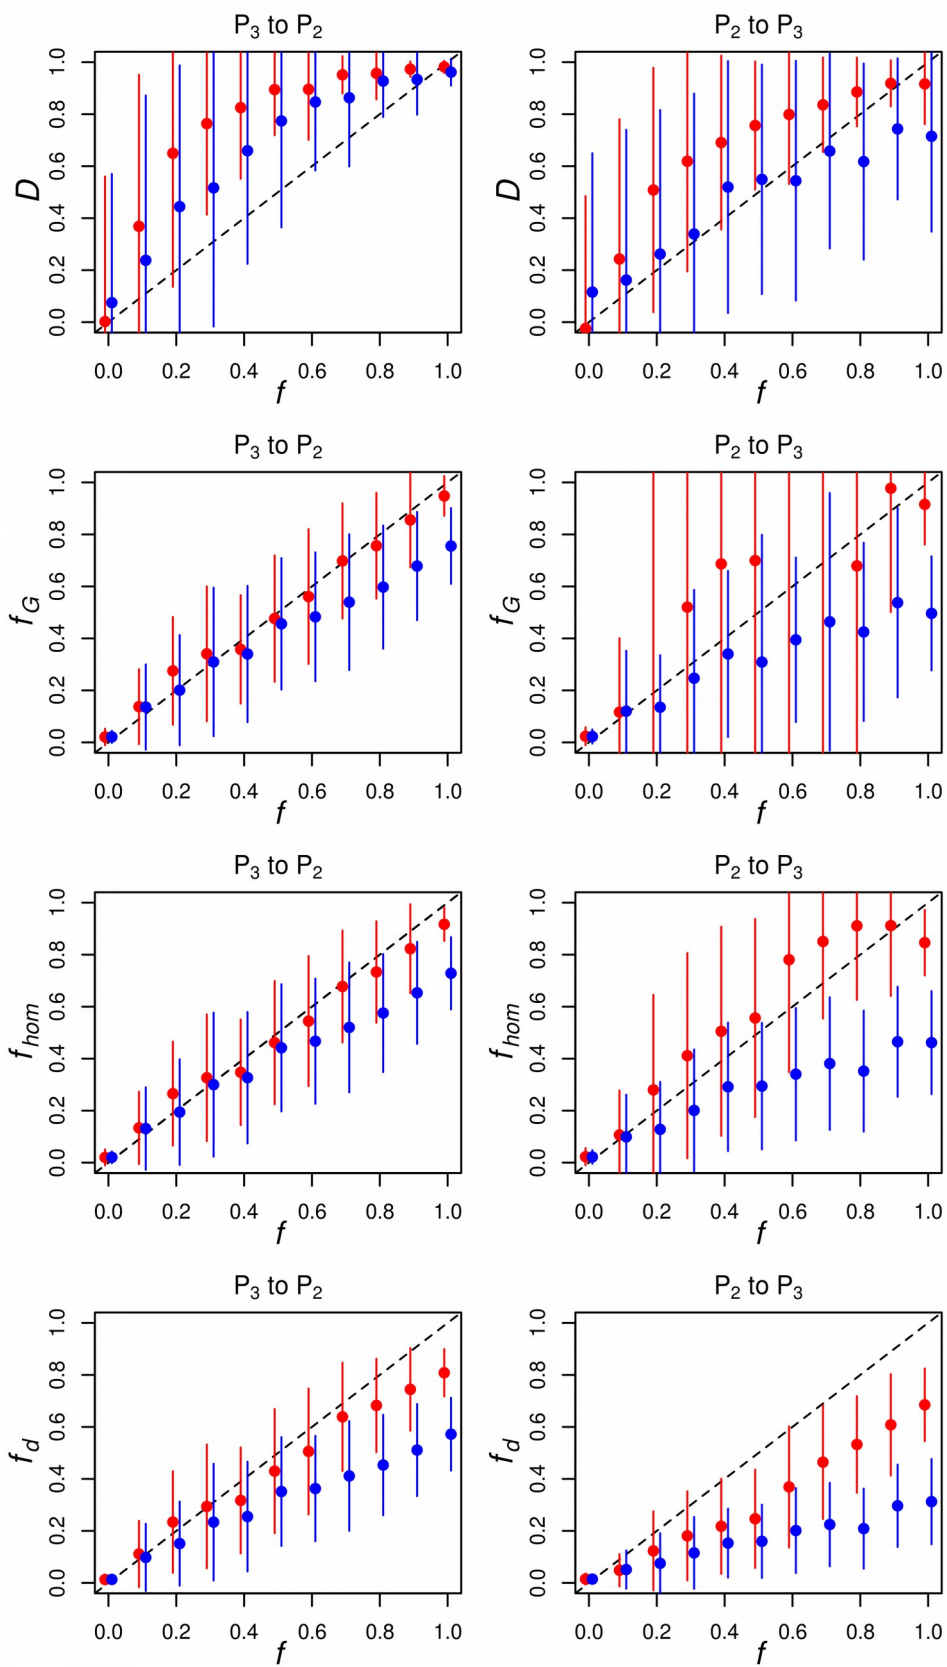

**Figure S1 Comparing statistics to detect and quantify introgression (B) window = 5 kb,  $4Nr = 0.001$**

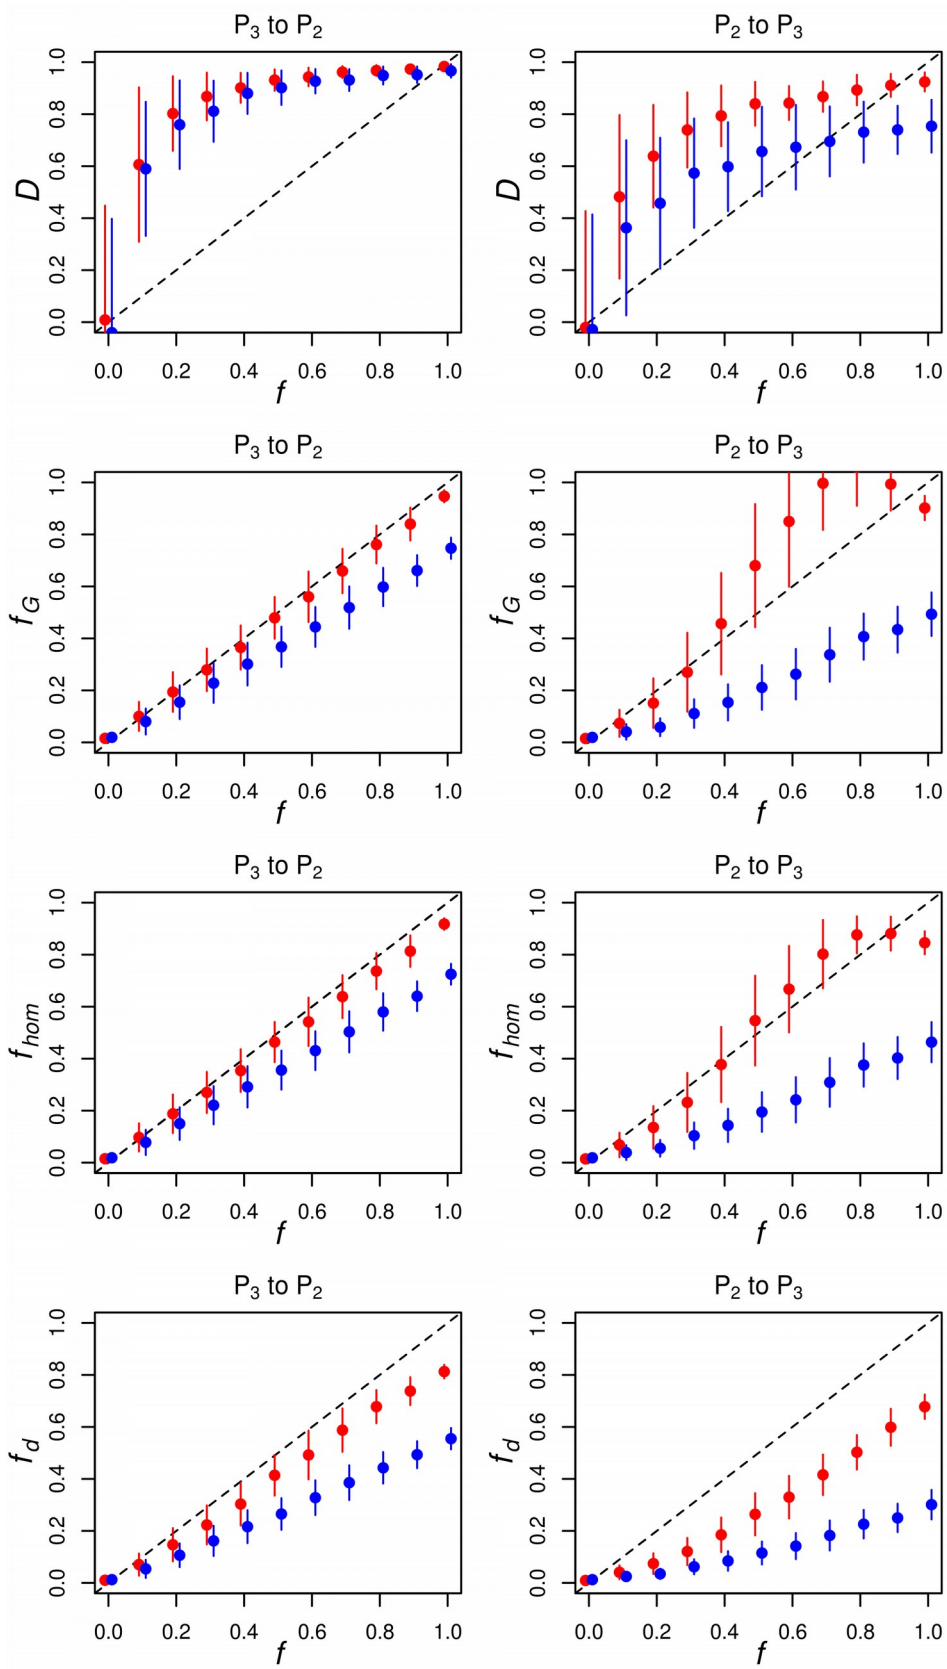

**Figure S1 Comparing statistics to detect and quantify introgression (C) window = 5 kb,  $4Nr = 0.1$**

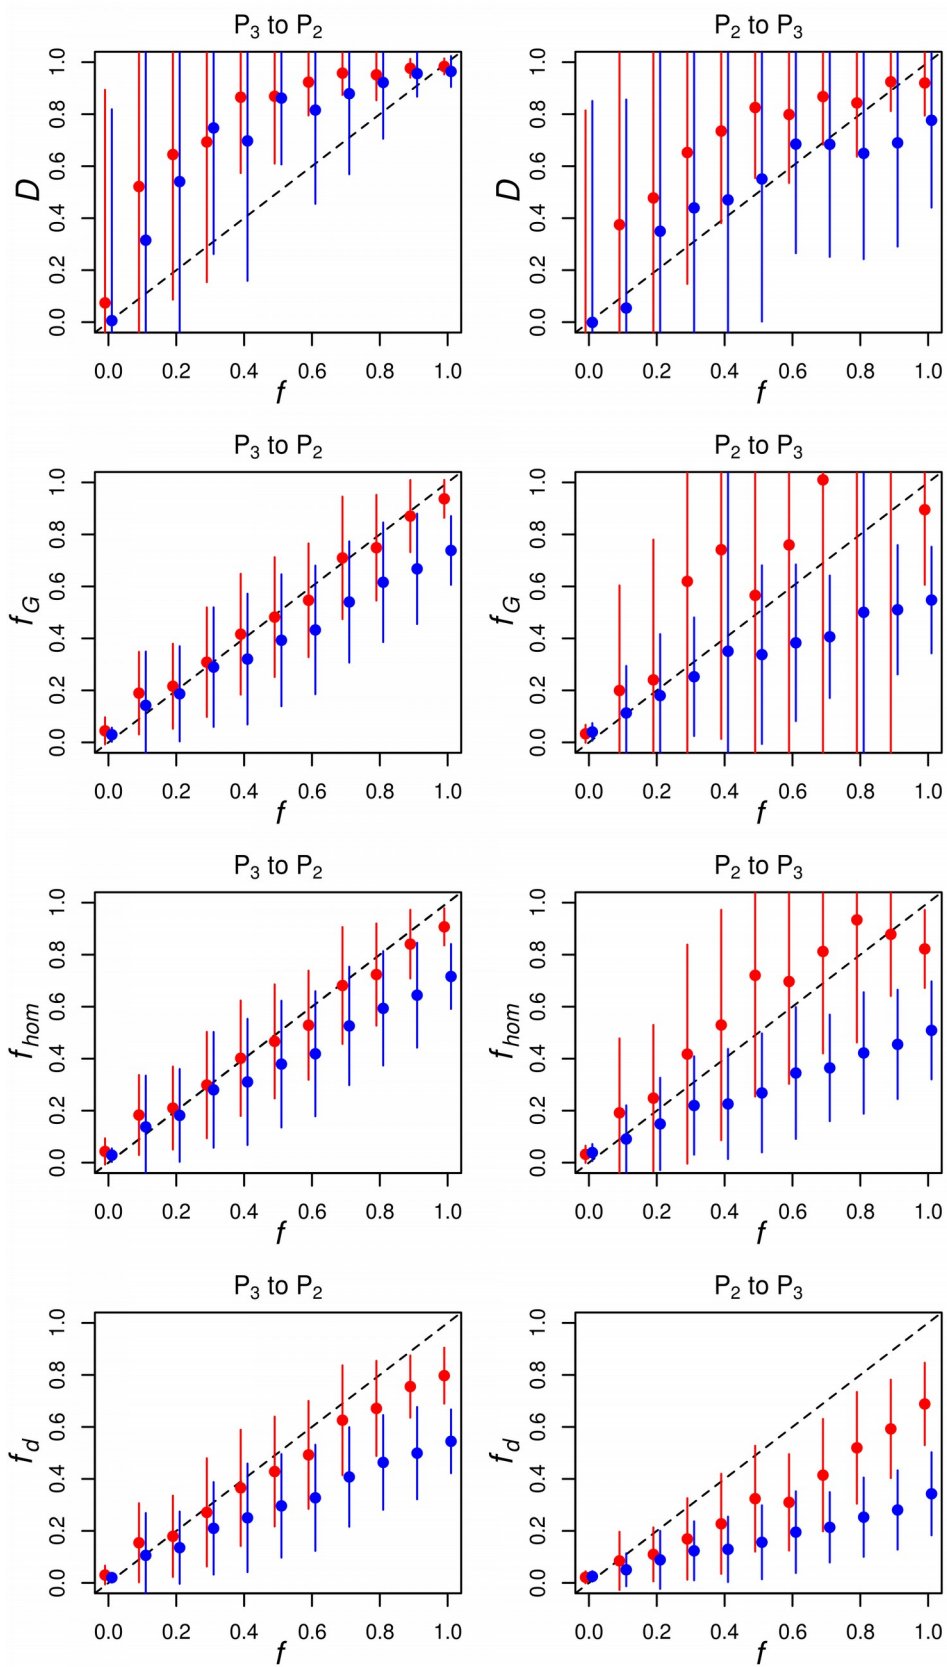

**Figure S1 Comparing statistics to detect and quantify introgression ( $D$ ) window = 1 kb,  $4Nr = 0.01$**

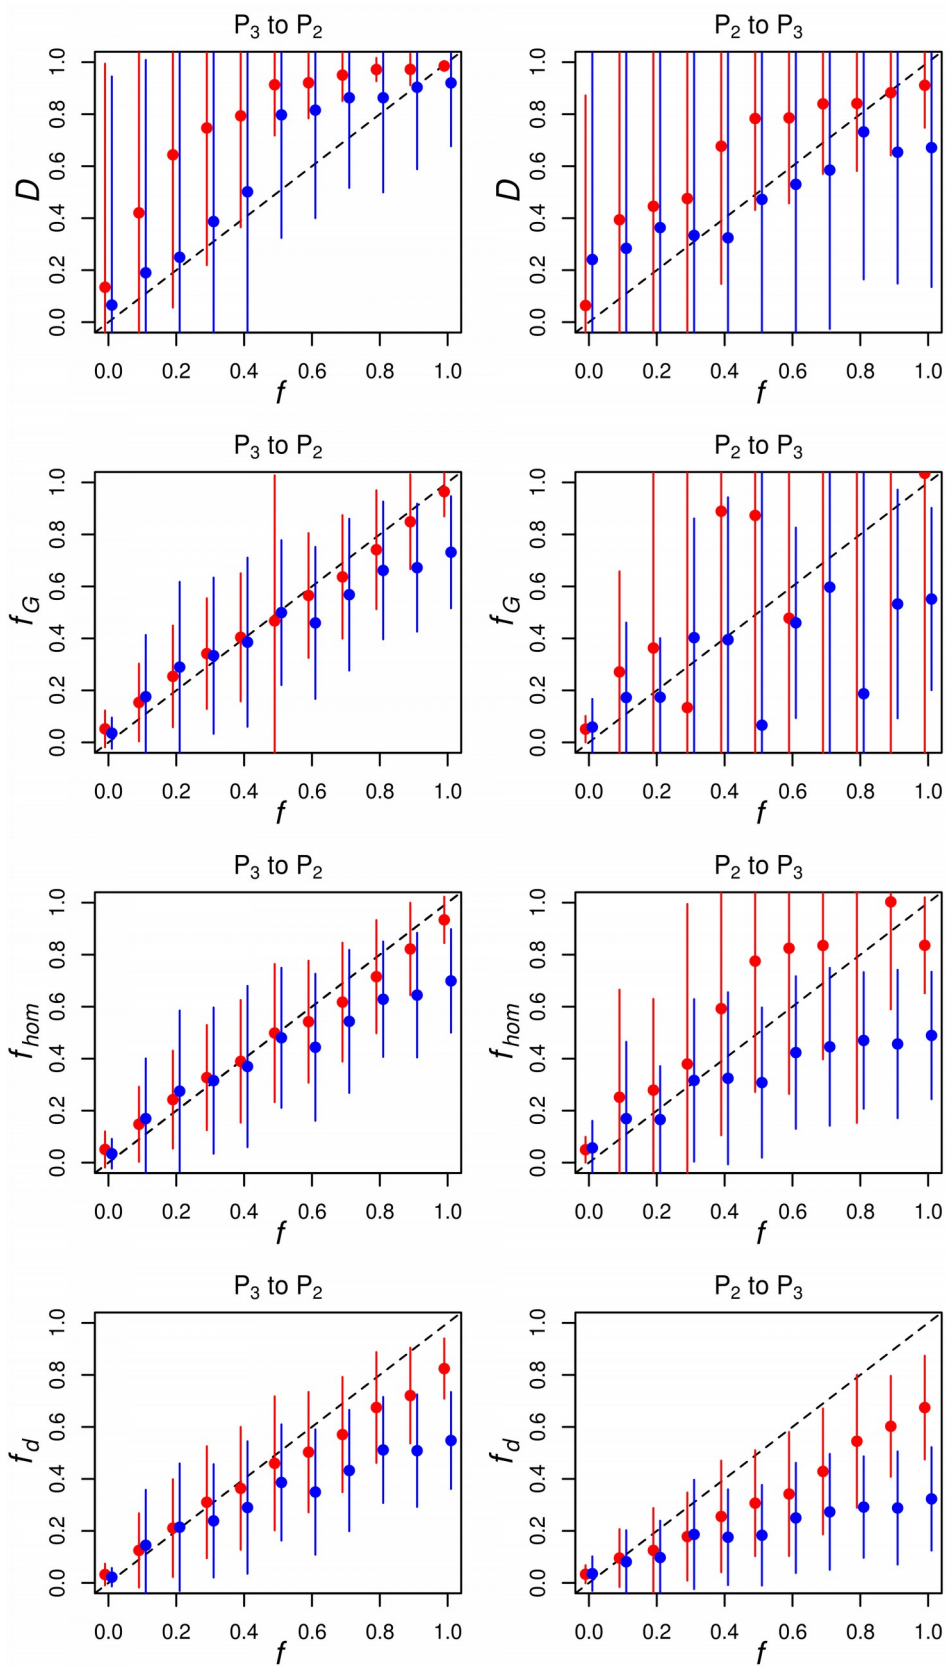

**Figure S1 Comparing statistics to detect and quantify introgression (E) window = 1 kb,  $4Nr = 0.001$**



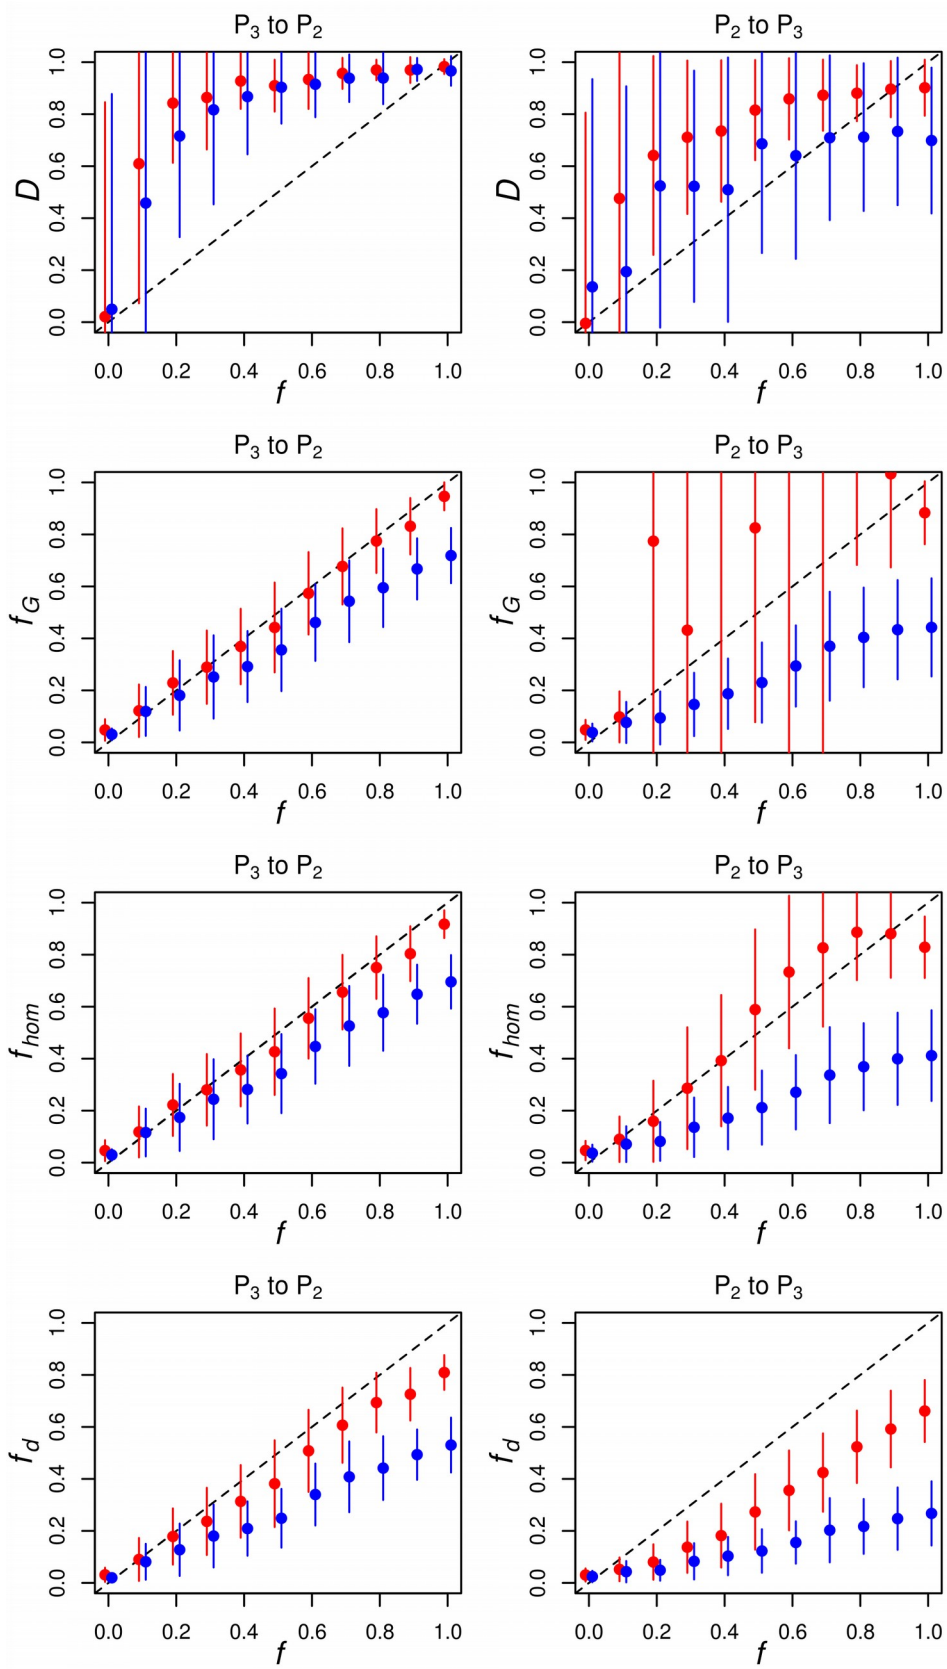

**Figure S1 Comparing statistics to detect and quantify introgression (F) window = 1 kb,  $4Nr = 0.1$**



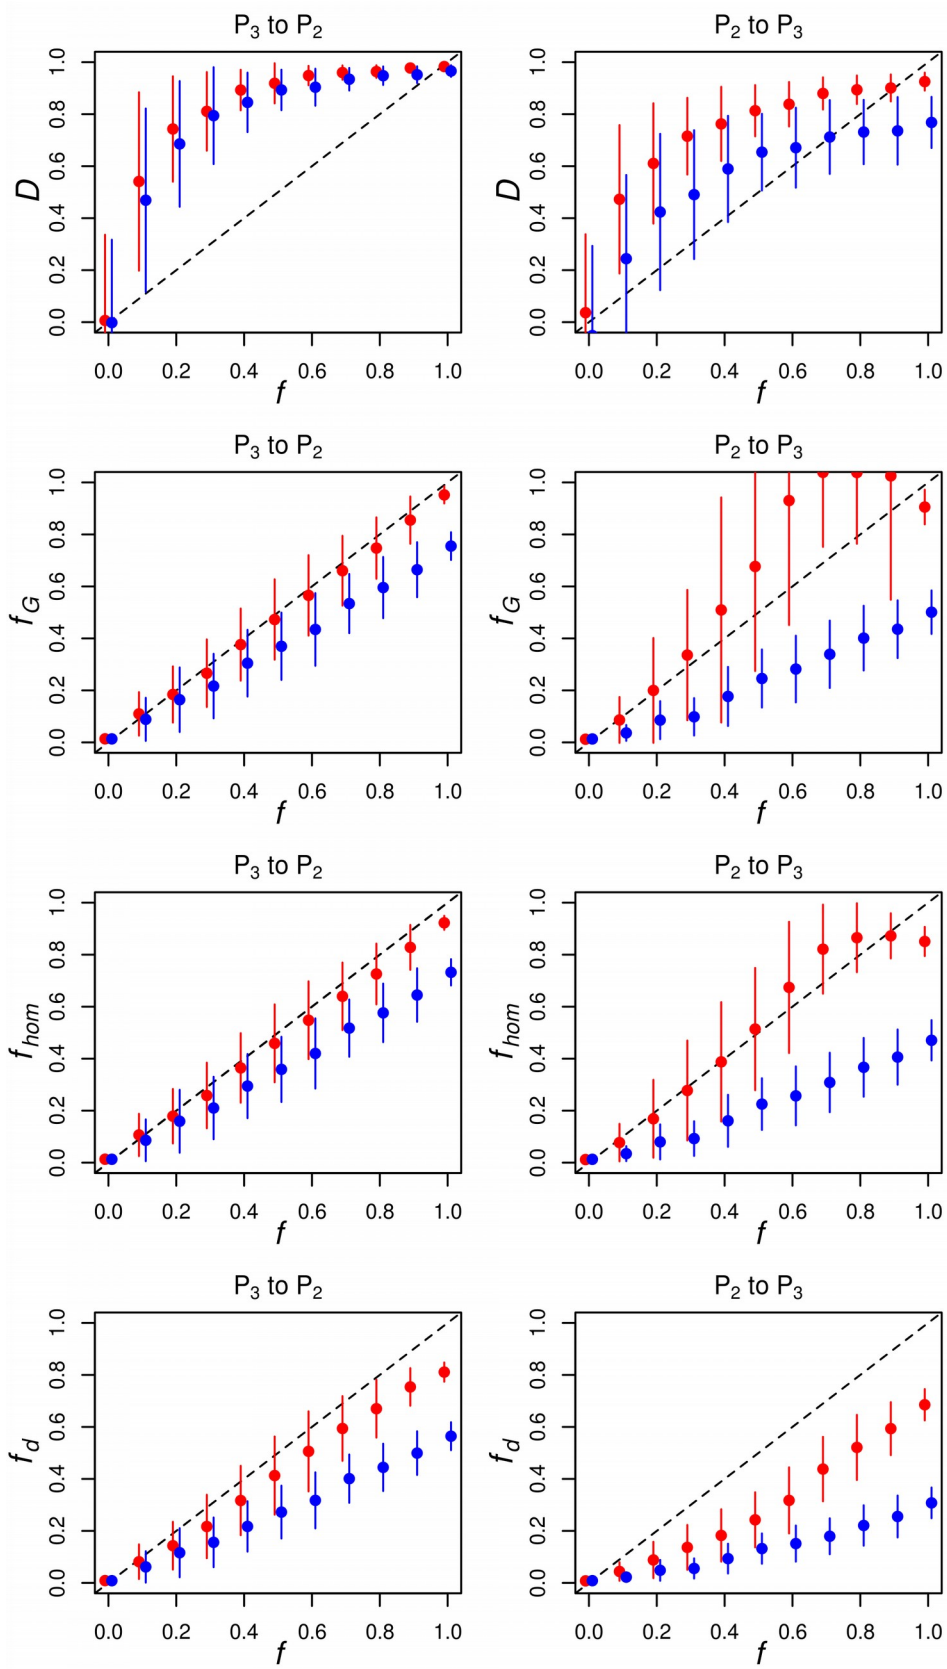

**Figure S1 Comparing statistics to detect and quantify introgression (G) window = 10 kb,  $4Nr = 0.01$**

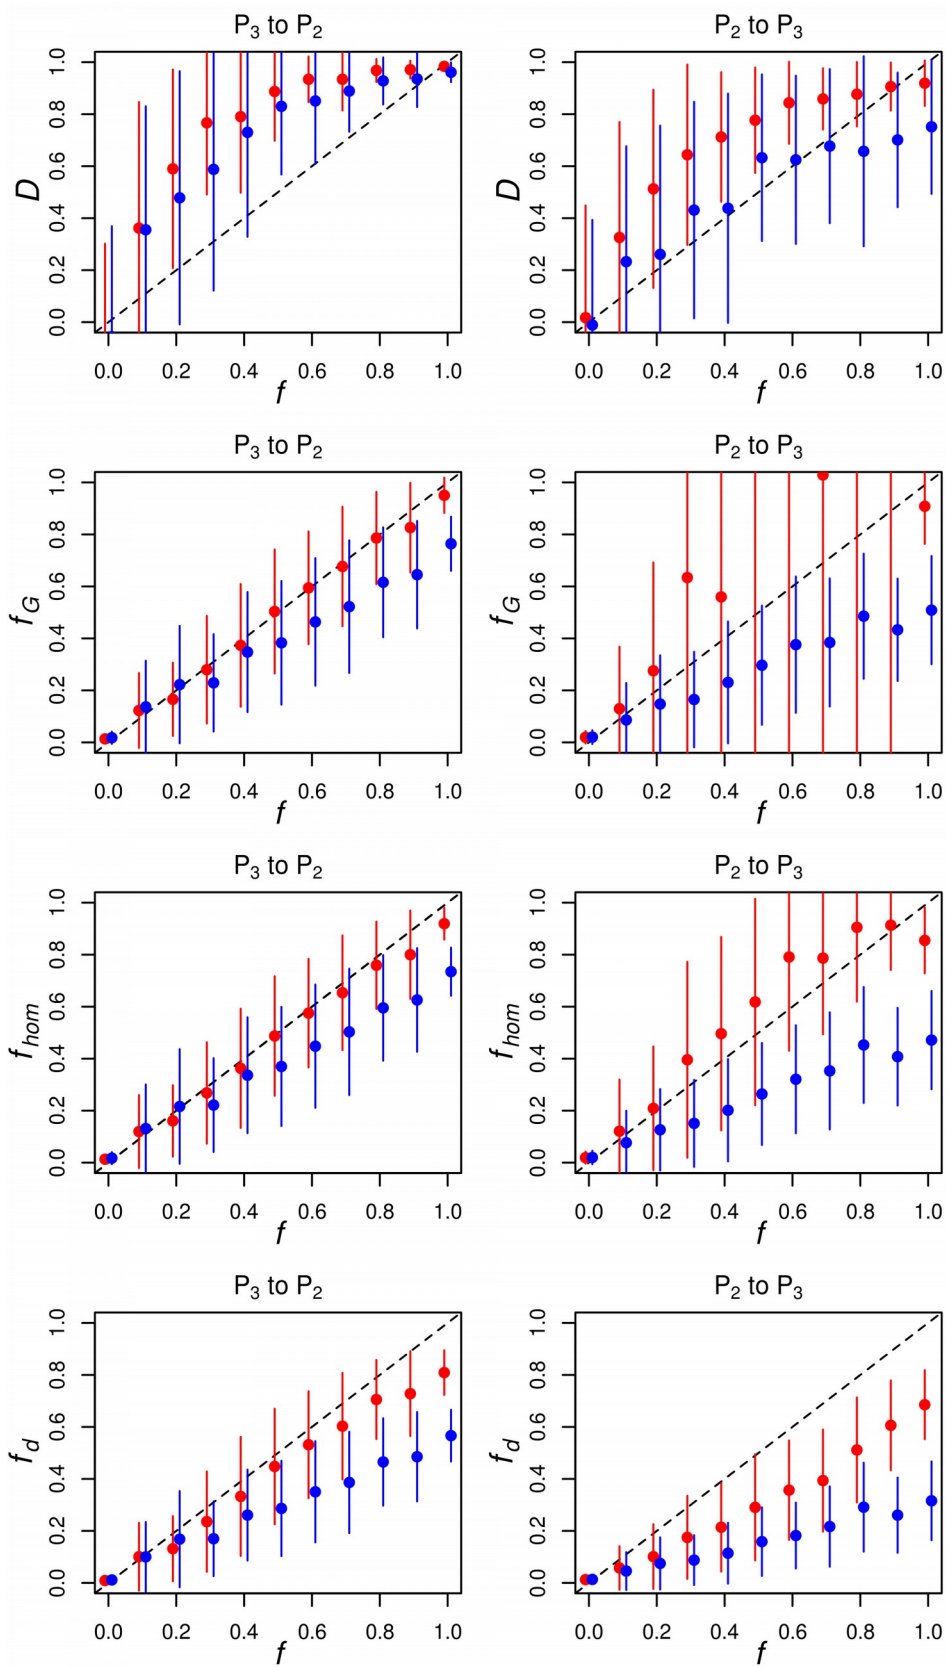

**Figure S1 Comparing statistics to detect and quantify introgression (H) window = 10 kb,  $4Nr = 0.001$**

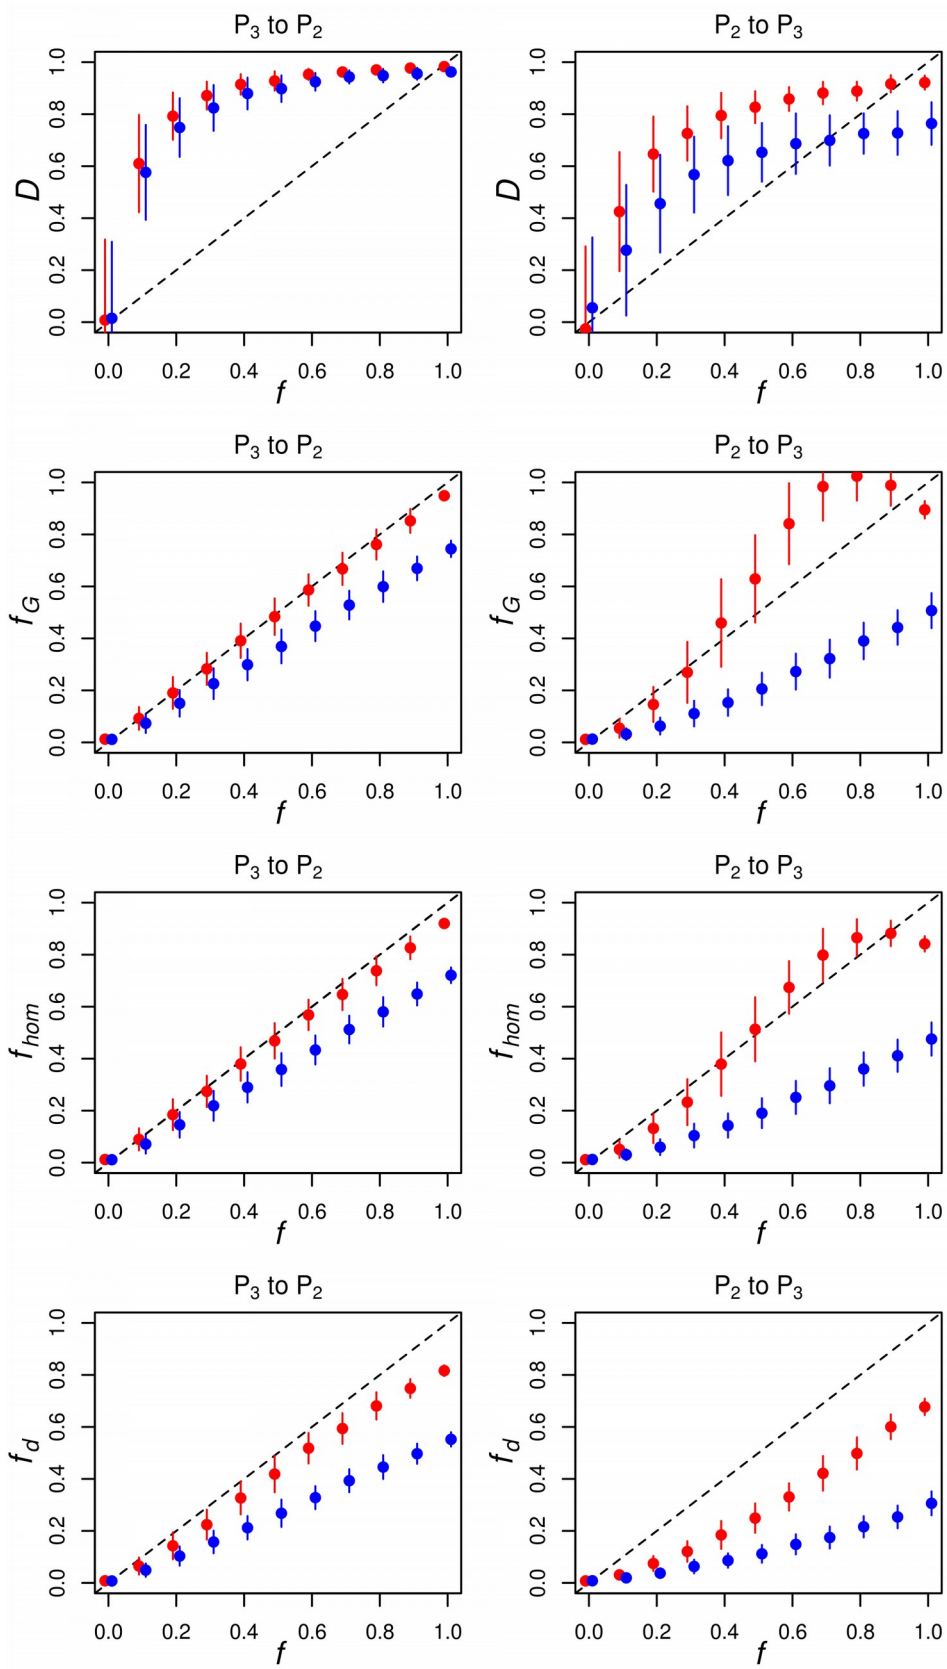

**Figure S1 Comparing statistics to detect and quantify introgression (I) window = 10 kb,  $4Nr = 0.1$**

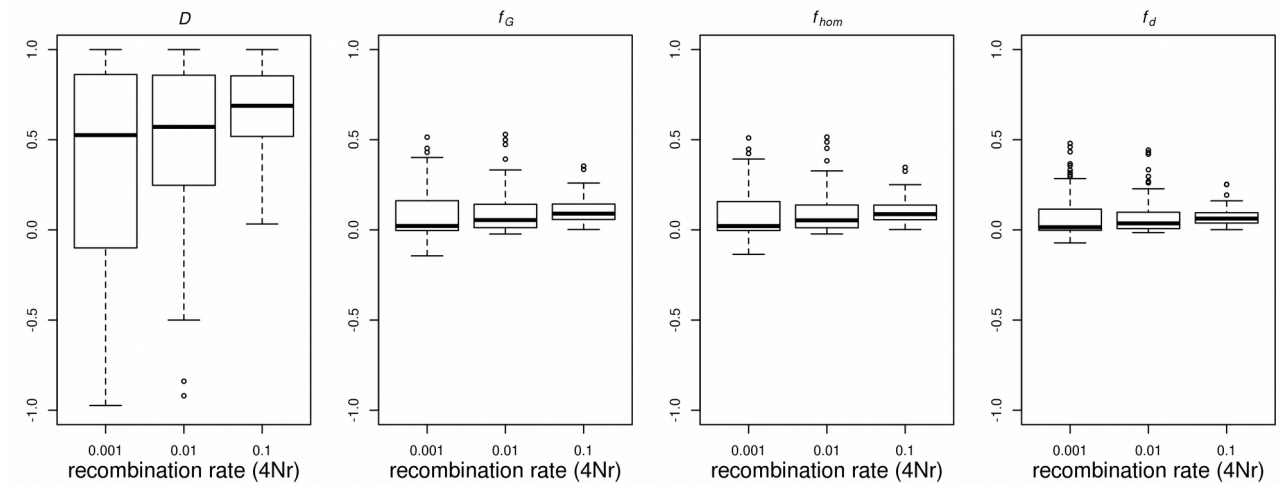

**Figure S2. Effects of recombination rate on the  $D$  statistic and  $f$  estimators.** Boxplots show the distribution of values for 100 simulated 5 kb windows, with  $f = 0.1$ , three different values for the population recombination rate ( $4Nr$ ) were tested: 0.001, 0.01 and 0.1.

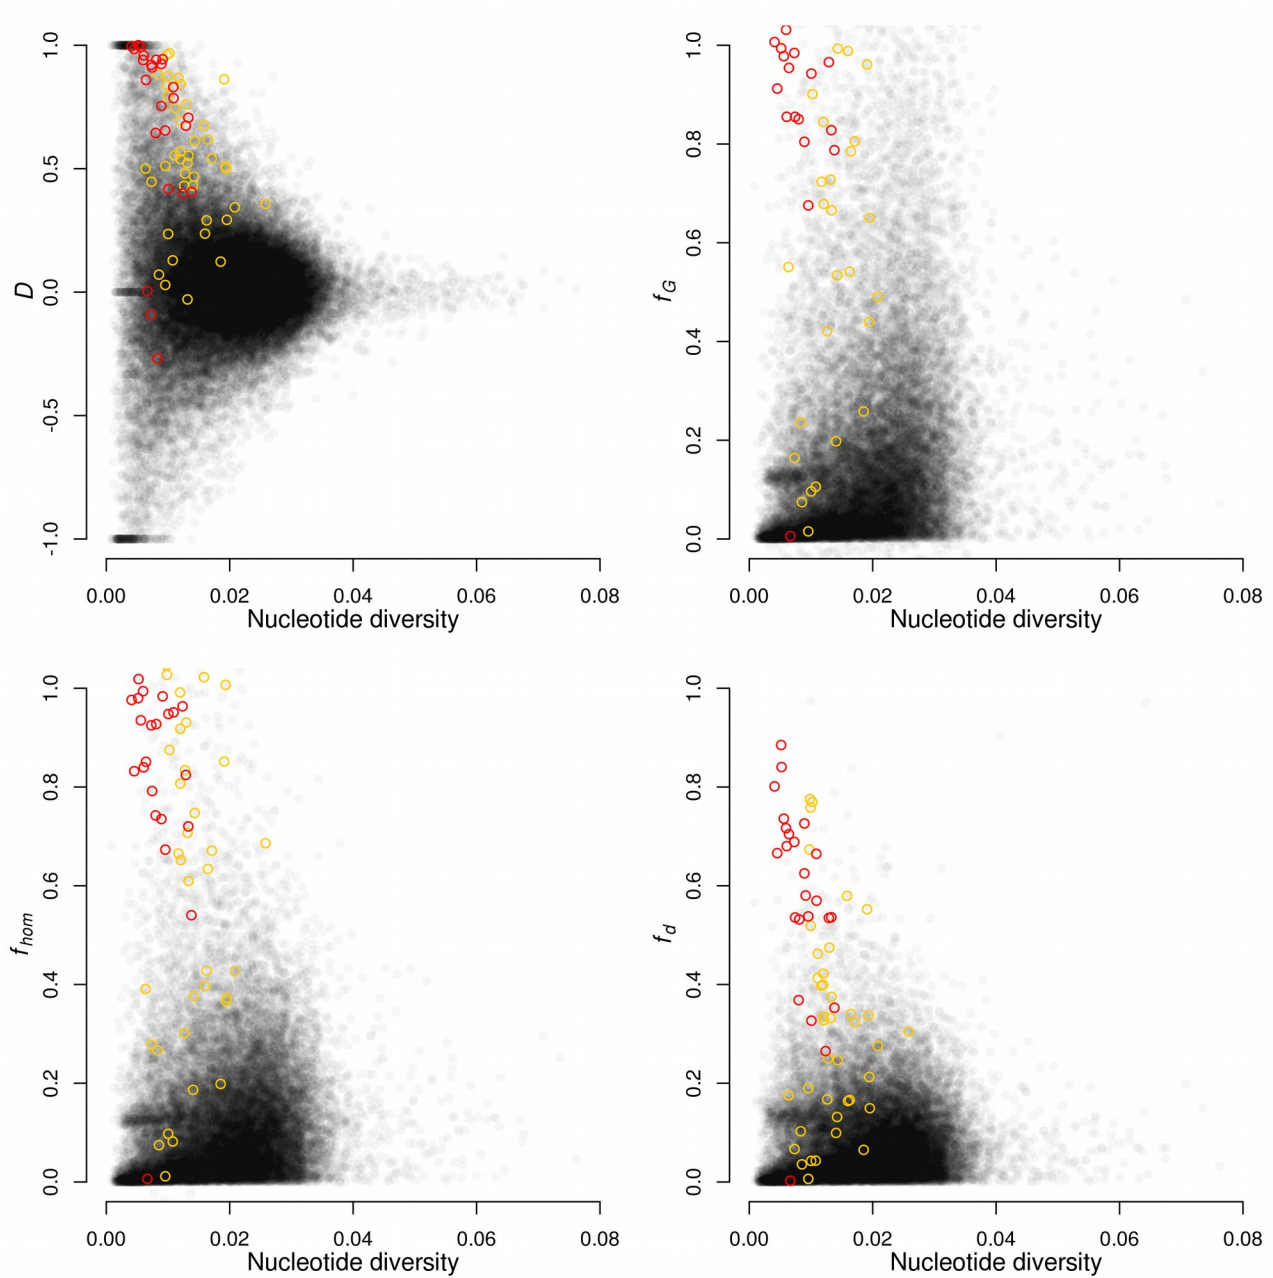

**Figure S3. Effects of genetic diversity on the  $D$  and  $f$  statistics in *Heliconius* whole genome data.**

**A,B.** Values of  $D$  and the three  $f$  statistics for non-overlapping 5 kb windows across the genome, plotted against nucleotide diversity.  $f$  values are only plotted for windows with  $D \geq 0$ . Data from Martin et al. 2013. Taxa used are as follows,  $P_1$ : *Heliconius melpomene aglaope*,  $P_2$ : *Heliconius melpomene amaryllis*,  $P_3$ : *Heliconius timareta thelxinoe*,  $O$ : four *Heliconius* species from the silvaniform clade. Colored points show windows located within the wing patterning loci *HmB* (red) and *HmYb* (yellow), see Methods.

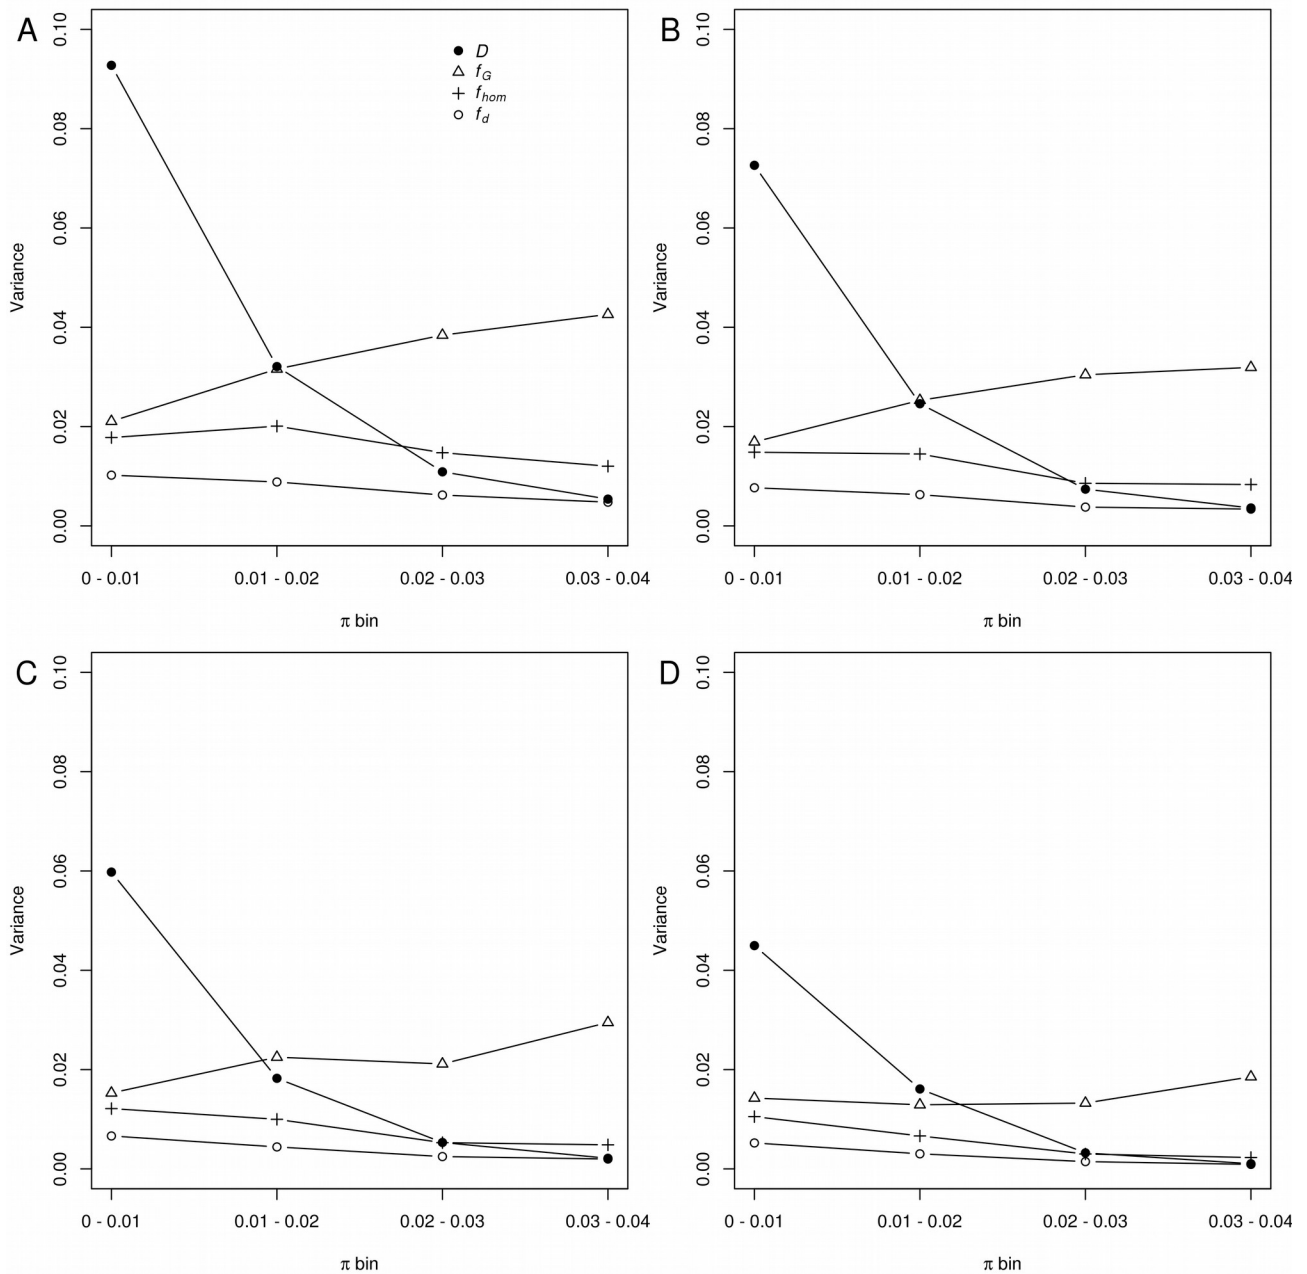

**Figure S4. Variance in  $D$  and  $f$  statistics plotted in bins of nucleotide diversity**

Each statistic was binned into one of four bins according to average nucleotide diversity ( $\pi$ ) in the three populations. Variance was calculated for each bin. For all four statistics, only windows with  $D \geq 0$  were considered because  $f$  statistics are meaningless when  $D$  is negative, and can range from 0 to negative infinity. For  $f_G$  and  $f_{hom}$ , windows with values greater than one were excluded for calculating variance. Four window sizes were examined: 5 kb (A), 10 kb (B), 20 kb (C) and 50 kb (D).

**Table S1.  $d_{XY}$  between  $P_2$  and  $P_3$  for different sets of windows, for models with GENE FLOW FROM  $P_3$  to  $P_2$ .**

The first three columns give the split times for the model and the time of gene flow in units of  $4N$  generations ago (see Fig. 4A). The 'Alt' and 'Bg' columns give  $d_{XY}$  between  $P_2$  and  $P_3$  for the 1000 Alternate and 9000 Background windows, respectively. For each of the introgression statistics, there are three columns giving  $d_{XY}$  between  $P_2$  and  $P_3$  for outliers (windows with the top 10% of values), non-outliers (the remaining 90% of windows) and then the percentage of the outliers that corresponded to real Alternate windows in the simulation (i.e. the level of accuracy of the statistic in identifying gene flow windows). Highlighted blocks indicate cases where  $d_{XY}$  in the Alternate or outlier windows was significantly lower than in the Background or non-outlier windows.

| $t_{23}$ | $t_{12}$ | $t_{GF}$ | Alt   | Bg    | $D$     |             |        | $f_d$   |             |        | $f_G$   |             |        | $f_{hom}$ |             |        |
|----------|----------|----------|-------|-------|---------|-------------|--------|---------|-------------|--------|---------|-------------|--------|-----------|-------------|--------|
|          |          |          |       |       | outlier | non-outlier | % cor. | outlier | non-outlier | % cor. | outlier | non-outlier | % cor. | outlier   | non-outlier | % cor. |
| 0.6      | 0.4      | 0.2      | 0.014 | 0.022 | 0.015   | 0.021       | 74.1   | 0.014   | 0.022       | 95.8   | 0.014   | 0.022       | 96.4   | 0.014     | 0.022       | 96.5   |
| 0.8      | 0.4      | 0.2      | 0.014 | 0.025 | 0.015   | 0.025       | 83.3   | 0.014   | 0.025       | 99.8   | 0.014   | 0.025       | 99.7   | 0.014     | 0.025       | 99.7   |
| 0.8      | 0.6      | 0.2      | 0.014 | 0.025 | 0.015   | 0.025       | 84.6   | 0.014   | 0.025       | 99.4   | 0.014   | 0.025       | 99.2   | 0.014     | 0.025       | 99.3   |
| 0.8      | 0.6      | 0.4      | 0.018 | 0.025 | 0.019   | 0.025       | 69.3   | 0.018   | 0.025       | 91.2   | 0.018   | 0.025       | 91.7   | 0.018     | 0.025       | 91.8   |
| 1        | 0.4      | 0.2      | 0.014 | 0.029 | 0.016   | 0.029       | 83.7   | 0.014   | 0.029       | 100    | 0.014   | 0.029       | 100    | 0.014     | 0.029       | 100    |
| 1        | 0.6      | 0.2      | 0.014 | 0.029 | 0.015   | 0.029       | 87     | 0.014   | 0.029       | 99.9   | 0.014   | 0.029       | 99.9   | 0.014     | 0.029       | 99.9   |
| 1        | 0.6      | 0.4      | 0.018 | 0.029 | 0.020   | 0.029       | 76.6   | 0.018   | 0.029       | 98.9   | 0.018   | 0.029       | 99.1   | 0.018     | 0.029       | 99.1   |
| 1        | 0.8      | 0.2      | 0.014 | 0.029 | 0.015   | 0.029       | 90.5   | 0.014   | 0.029       | 99.9   | 0.014   | 0.029       | 99.9   | 0.014     | 0.029       | 99.9   |
| 1        | 0.8      | 0.4      | 0.018 | 0.029 | 0.019   | 0.029       | 81.9   | 0.018   | 0.029       | 98.5   | 0.018   | 0.029       | 98.6   | 0.018     | 0.029       | 98.5   |
| 1        | 0.8      | 0.6      | 0.022 | 0.029 | 0.023   | 0.029       | 64.9   | 0.022   | 0.029       | 88.5   | 0.022   | 0.029       | 88.9   | 0.022     | 0.029       | 88.9   |
| 1.2      | 0.4      | 0.2      | 0.014 | 0.033 | 0.016   | 0.033       | 84     | 0.014   | 0.033       | 100    | 0.014   | 0.033       | 100    | 0.014     | 0.033       | 100    |
| 1.2      | 0.6      | 0.2      | 0.014 | 0.033 | 0.016   | 0.033       | 86.6   | 0.014   | 0.033       | 100    | 0.014   | 0.033       | 100    | 0.014     | 0.033       | 100    |
| 1.2      | 0.6      | 0.4      | 0.018 | 0.033 | 0.020   | 0.033       | 79.1   | 0.018   | 0.033       | 100    | 0.018   | 0.033       | 100    | 0.018     | 0.033       | 100    |
| 1.2      | 0.8      | 0.2      | 0.014 | 0.033 | 0.015   | 0.033       | 91.1   | 0.014   | 0.033       | 100    | 0.014   | 0.033       | 100    | 0.014     | 0.033       | 100    |
| 1.2      | 0.8      | 0.4      | 0.018 | 0.033 | 0.020   | 0.033       | 83.7   | 0.018   | 0.033       | 99.9   | 0.018   | 0.033       | 99.9   | 0.018     | 0.033       | 99.9   |
| 1.2      | 0.8      | 0.6      | 0.022 | 0.033 | 0.024   | 0.033       | 74.1   | 0.022   | 0.033       | 98.5   | 0.022   | 0.033       | 98.7   | 0.022     | 0.033       | 98.9   |
| 1.2      | 1        | 0.2      | 0.014 | 0.033 | 0.015   | 0.033       | 94     | 0.014   | 0.033       | 100    | 0.014   | 0.033       | 100    | 0.014     | 0.033       | 100    |
| 1.2      | 1        | 0.4      | 0.018 | 0.033 | 0.019   | 0.033       | 88.6   | 0.018   | 0.033       | 99.9   | 0.018   | 0.033       | 99.8   | 0.018     | 0.033       | 99.8   |
| 1.2      | 1        | 0.6      | 0.022 | 0.033 | 0.023   | 0.033       | 79.8   | 0.022   | 0.033       | 97.8   | 0.022   | 0.033       | 97.9   | 0.022     | 0.033       | 97.8   |
| 1.2      | 1        | 0.8      | 0.026 | 0.033 | 0.028   | 0.033       | 61.6   | 0.026   | 0.033       | 87.2   | 0.026   | 0.033       | 87.2   | 0.026     | 0.033       | 87.4   |
| 1.4      | 0.4      | 0.2      | 0.014 | 0.037 | 0.017   | 0.037       | 81.8   | 0.014   | 0.037       | 100    | 0.014   | 0.037       | 100    | 0.014     | 0.037       | 100    |
| 1.4      | 0.6      | 0.2      | 0.014 | 0.037 | 0.017   | 0.037       | 84.9   | 0.014   | 0.037       | 100    | 0.014   | 0.037       | 100    | 0.014     | 0.037       | 100    |
| 1.4      | 0.6      | 0.4      | 0.018 | 0.037 | 0.021   | 0.037       | 80.3   | 0.018   | 0.037       | 100    | 0.018   | 0.037       | 100    | 0.018     | 0.037       | 100    |
| 1.4      | 0.8      | 0.2      | 0.014 | 0.037 | 0.017   | 0.037       | 86.2   | 0.014   | 0.037       | 100    | 0.014   | 0.037       | 100    | 0.014     | 0.037       | 100    |
| 1.4      | 0.8      | 0.4      | 0.018 | 0.037 | 0.021   | 0.037       | 81.8   | 0.018   | 0.037       | 100    | 0.018   | 0.037       | 100    | 0.018     | 0.037       | 100    |
| 1.4      | 0.8      | 0.6      | 0.021 | 0.037 | 0.025   | 0.037       | 75.2   | 0.021   | 0.037       | 100    | 0.021   | 0.037       | 100    | 0.021     | 0.037       | 100    |
| 1.4      | 1        | 0.2      | 0.014 | 0.037 | 0.015   | 0.037       | 91.4   | 0.014   | 0.037       | 100    | 0.014   | 0.037       | 100    | 0.014     | 0.037       | 100    |
| 1.4      | 1        | 0.4      | 0.018 | 0.037 | 0.020   | 0.037       | 87.8   | 0.018   | 0.037       | 100    | 0.018   | 0.037       | 100    | 0.018     | 0.037       | 100    |
| 1.4      | 1        | 0.6      | 0.021 | 0.037 | 0.024   | 0.037       | 80.8   | 0.021   | 0.037       | 99.8   | 0.021   | 0.037       | 99.8   | 0.021     | 0.037       | 99.8   |
| 1.4      | 1        | 0.8      | 0.025 | 0.037 | 0.028   | 0.037       | 69.7   | 0.026   | 0.037       | 97.6   | 0.026   | 0.037       | 97.8   | 0.026     | 0.037       | 97.8   |
| 1.4      | 1.2      | 0.2      | 0.014 | 0.037 | 0.015   | 0.037       | 94.7   | 0.014   | 0.037       | 100    | 0.014   | 0.037       | 100    | 0.014     | 0.037       | 100    |
| 1.4      | 1.2      | 0.4      | 0.018 | 0.037 | 0.019   | 0.037       | 91.2   | 0.018   | 0.037       | 100    | 0.018   | 0.037       | 100    | 0.018     | 0.037       | 100    |
| 1.4      | 1.2      | 0.6      | 0.021 | 0.037 | 0.023   | 0.037       | 85.7   | 0.021   | 0.037       | 99.8   | 0.021   | 0.037       | 99.7   | 0.021     | 0.037       | 99.8   |
| 1.4      | 1.2      | 0.8      | 0.025 | 0.037 | 0.027   | 0.037       | 76.5   | 0.026   | 0.037       | 97.2   | 0.026   | 0.037       | 97.2   | 0.026     | 0.037       | 97.2   |
| 1.4      | 1.2      | 1        | 0.029 | 0.037 | 0.031   | 0.037       | 59.4   | 0.030   | 0.037       | 85     | 0.030   | 0.037       | 86.2   | 0.030     | 0.037       | 86.3   |



|     |     |     |       |       |       |       |      |       |       |      |       |       |      |       |       |      |
|-----|-----|-----|-------|-------|-------|-------|------|-------|-------|------|-------|-------|------|-------|-------|------|
| 1.6 | 0.4 | 0.2 | 0.014 | 0.041 | 0.019 | 0.040 | 78.9 | 0.014 | 0.041 | 100  | 0.014 | 0.041 | 100  | 0.014 | 0.041 | 100  |
| 1.6 | 0.6 | 0.2 | 0.014 | 0.041 | 0.018 | 0.040 | 82.7 | 0.014 | 0.041 | 100  | 0.014 | 0.041 | 100  | 0.014 | 0.041 | 100  |
| 1.6 | 0.6 | 0.4 | 0.018 | 0.041 | 0.022 | 0.040 | 79.4 | 0.018 | 0.041 | 100  | 0.018 | 0.041 | 100  | 0.018 | 0.041 | 100  |
| 1.6 | 0.8 | 0.2 | 0.014 | 0.041 | 0.017 | 0.040 | 86.8 | 0.014 | 0.041 | 100  | 0.014 | 0.041 | 100  | 0.014 | 0.041 | 100  |
| 1.6 | 0.8 | 0.4 | 0.018 | 0.041 | 0.021 | 0.040 | 83.6 | 0.018 | 0.041 | 100  | 0.018 | 0.041 | 100  | 0.018 | 0.041 | 100  |
| 1.6 | 0.8 | 0.6 | 0.022 | 0.041 | 0.025 | 0.040 | 78.3 | 0.022 | 0.041 | 100  | 0.022 | 0.041 | 100  | 0.022 | 0.041 | 100  |
| 1.6 | 1   | 0.2 | 0.014 | 0.041 | 0.016 | 0.040 | 89.4 | 0.014 | 0.041 | 100  | 0.014 | 0.041 | 100  | 0.014 | 0.041 | 100  |
| 1.6 | 1   | 0.4 | 0.018 | 0.041 | 0.021 | 0.040 | 85.9 | 0.018 | 0.041 | 100  | 0.018 | 0.041 | 100  | 0.018 | 0.041 | 100  |
| 1.6 | 1   | 0.6 | 0.022 | 0.041 | 0.025 | 0.040 | 81.1 | 0.022 | 0.041 | 100  | 0.022 | 0.041 | 100  | 0.022 | 0.041 | 100  |
| 1.6 | 1   | 0.8 | 0.025 | 0.041 | 0.029 | 0.040 | 75.1 | 0.025 | 0.041 | 99.9 | 0.025 | 0.041 | 99.9 | 0.025 | 0.041 | 99.9 |
| 1.6 | 1.2 | 0.2 | 0.014 | 0.041 | 0.015 | 0.041 | 94.2 | 0.014 | 0.041 | 100  | 0.014 | 0.041 | 100  | 0.014 | 0.041 | 100  |
| 1.6 | 1.2 | 0.4 | 0.018 | 0.041 | 0.019 | 0.041 | 91.4 | 0.018 | 0.041 | 100  | 0.018 | 0.041 | 100  | 0.018 | 0.041 | 100  |
| 1.6 | 1.2 | 0.6 | 0.022 | 0.041 | 0.023 | 0.041 | 88   | 0.022 | 0.041 | 100  | 0.022 | 0.041 | 100  | 0.022 | 0.041 | 100  |
| 1.6 | 1.2 | 0.8 | 0.025 | 0.041 | 0.028 | 0.041 | 81.2 | 0.025 | 0.041 | 99.9 | 0.025 | 0.041 | 99.8 | 0.025 | 0.041 | 99.8 |
| 1.6 | 1.2 | 1   | 0.029 | 0.041 | 0.032 | 0.041 | 71.1 | 0.029 | 0.041 | 98   | 0.029 | 0.041 | 98.2 | 0.029 | 0.041 | 98.2 |
| 1.6 | 1.4 | 0.2 | 0.014 | 0.041 | 0.015 | 0.041 | 96.4 | 0.014 | 0.041 | 100  | 0.014 | 0.041 | 100  | 0.014 | 0.041 | 100  |
| 1.6 | 1.4 | 0.4 | 0.018 | 0.041 | 0.019 | 0.041 | 94.9 | 0.018 | 0.041 | 100  | 0.018 | 0.041 | 100  | 0.018 | 0.041 | 100  |
| 1.6 | 1.4 | 0.6 | 0.022 | 0.041 | 0.023 | 0.041 | 91.7 | 0.022 | 0.041 | 99.9 | 0.022 | 0.041 | 99.9 | 0.022 | 0.041 | 99.9 |
| 1.6 | 1.4 | 0.8 | 0.025 | 0.041 | 0.027 | 0.041 | 86   | 0.025 | 0.041 | 99.5 | 0.025 | 0.041 | 99.3 | 0.025 | 0.041 | 99.4 |
| 1.6 | 1.4 | 1.2 | 0.033 | 0.041 | 0.035 | 0.041 | 60.2 | 0.033 | 0.041 | 85.4 | 0.033 | 0.041 | 85.7 | 0.033 | 0.041 | 86.2 |
| 1.6 | 1.4 | 1   | 0.029 | 0.041 | 0.031 | 0.041 | 76.3 | 0.029 | 0.041 | 97   | 0.029 | 0.041 | 96.5 | 0.029 | 0.041 | 96.6 |
| 1.8 | 0.4 | 0.2 | 0.014 | 0.045 | 0.022 | 0.044 | 73.8 | 0.014 | 0.045 | 100  | 0.014 | 0.045 | 100  | 0.014 | 0.045 | 100  |
| 1.8 | 0.6 | 0.2 | 0.014 | 0.045 | 0.020 | 0.044 | 78.7 | 0.014 | 0.045 | 100  | 0.014 | 0.045 | 100  | 0.014 | 0.045 | 100  |
| 1.8 | 0.6 | 0.4 | 0.018 | 0.045 | 0.023 | 0.044 | 76.9 | 0.018 | 0.045 | 100  | 0.018 | 0.045 | 100  | 0.018 | 0.045 | 100  |
| 1.8 | 0.8 | 0.2 | 0.014 | 0.045 | 0.018 | 0.044 | 84.5 | 0.014 | 0.045 | 100  | 0.014 | 0.045 | 100  | 0.014 | 0.045 | 100  |
| 1.8 | 0.8 | 0.4 | 0.018 | 0.045 | 0.022 | 0.044 | 81.8 | 0.018 | 0.045 | 100  | 0.018 | 0.045 | 100  | 0.018 | 0.045 | 100  |
| 1.8 | 0.8 | 0.6 | 0.022 | 0.045 | 0.026 | 0.044 | 77.5 | 0.022 | 0.045 | 100  | 0.022 | 0.045 | 100  | 0.022 | 0.045 | 100  |
| 1.8 | 1   | 0.2 | 0.014 | 0.044 | 0.017 | 0.044 | 88.6 | 0.014 | 0.044 | 100  | 0.014 | 0.044 | 100  | 0.014 | 0.044 | 100  |
| 1.8 | 1   | 0.4 | 0.018 | 0.044 | 0.021 | 0.044 | 86.1 | 0.018 | 0.044 | 100  | 0.018 | 0.044 | 100  | 0.018 | 0.044 | 100  |
| 1.8 | 1   | 0.6 | 0.022 | 0.044 | 0.025 | 0.044 | 81.8 | 0.022 | 0.044 | 100  | 0.022 | 0.044 | 100  | 0.022 | 0.044 | 100  |
| 1.8 | 1   | 0.8 | 0.026 | 0.044 | 0.029 | 0.044 | 77   | 0.026 | 0.044 | 100  | 0.026 | 0.044 | 100  | 0.026 | 0.044 | 100  |
| 1.8 | 1.2 | 0.2 | 0.014 | 0.045 | 0.016 | 0.044 | 91.6 | 0.014 | 0.045 | 100  | 0.014 | 0.045 | 100  | 0.014 | 0.045 | 100  |
| 1.8 | 1.2 | 0.4 | 0.018 | 0.045 | 0.020 | 0.044 | 89.6 | 0.018 | 0.045 | 100  | 0.018 | 0.045 | 100  | 0.018 | 0.045 | 100  |
| 1.8 | 1.2 | 0.6 | 0.022 | 0.045 | 0.024 | 0.044 | 85.3 | 0.022 | 0.045 | 100  | 0.022 | 0.045 | 100  | 0.022 | 0.045 | 100  |
| 1.8 | 1.2 | 0.8 | 0.026 | 0.045 | 0.029 | 0.044 | 80.4 | 0.026 | 0.045 | 100  | 0.026 | 0.045 | 100  | 0.026 | 0.045 | 100  |
| 1.8 | 1.2 | 1   | 0.029 | 0.045 | 0.033 | 0.044 | 74.5 | 0.029 | 0.045 | 99.8 | 0.029 | 0.045 | 99.8 | 0.029 | 0.045 | 99.8 |
| 1.8 | 1.4 | 0.2 | 0.014 | 0.045 | 0.015 | 0.044 | 94.1 | 0.014 | 0.045 | 100  | 0.014 | 0.045 | 100  | 0.014 | 0.045 | 100  |
| 1.8 | 1.4 | 0.4 | 0.018 | 0.045 | 0.019 | 0.044 | 92.7 | 0.018 | 0.045 | 100  | 0.018 | 0.045 | 100  | 0.018 | 0.045 | 100  |
| 1.8 | 1.4 | 0.6 | 0.022 | 0.045 | 0.024 | 0.044 | 89.9 | 0.022 | 0.045 | 100  | 0.022 | 0.045 | 100  | 0.022 | 0.045 | 100  |
| 1.8 | 1.4 | 0.8 | 0.026 | 0.045 | 0.028 | 0.044 | 87   | 0.026 | 0.045 | 100  | 0.026 | 0.045 | 100  | 0.026 | 0.045 | 100  |
| 1.8 | 1.4 | 1.2 | 0.033 | 0.045 | 0.036 | 0.044 | 71.6 | 0.033 | 0.045 | 97.4 | 0.033 | 0.045 | 97.6 | 0.033 | 0.045 | 97.6 |
| 1.8 | 1.4 | 1   | 0.029 | 0.045 | 0.032 | 0.044 | 82.3 | 0.029 | 0.045 | 99.8 | 0.029 | 0.045 | 99.8 | 0.029 | 0.045 | 99.8 |
| 1.8 | 1.6 | 0.2 | 0.014 | 0.045 | 0.015 | 0.044 | 97.3 | 0.014 | 0.045 | 100  | 0.014 | 0.045 | 100  | 0.014 | 0.045 | 100  |
| 1.8 | 1.6 | 0.4 | 0.018 | 0.045 | 0.018 | 0.044 | 96.3 | 0.018 | 0.045 | 100  | 0.018 | 0.045 | 100  | 0.018 | 0.045 | 100  |
| 1.8 | 1.6 | 0.6 | 0.022 | 0.045 | 0.023 | 0.044 | 93.9 | 0.022 | 0.045 | 100  | 0.022 | 0.045 | 100  | 0.022 | 0.045 | 100  |
| 1.8 | 1.6 | 0.8 | 0.026 | 0.045 | 0.027 | 0.044 | 90   | 0.026 | 0.045 | 100  | 0.026 | 0.045 | 100  | 0.026 | 0.045 | 100  |
| 1.8 | 1.6 | 1.2 | 0.033 | 0.045 | 0.035 | 0.044 | 74.1 | 0.034 | 0.045 | 95.9 | 0.034 | 0.045 | 95.9 | 0.033 | 0.045 | 95.9 |
| 1.8 | 1.6 | 1.4 | 0.037 | 0.045 | 0.039 | 0.044 | 55.5 | 0.037 | 0.044 | 81.1 | 0.037 | 0.044 | 81.8 | 0.037 | 0.044 | 81.9 |
| 1.8 | 1.6 | 1   | 0.029 | 0.045 | 0.031 | 0.044 | 86.2 | 0.029 | 0.045 | 99.5 | 0.029 | 0.045 | 99.5 | 0.029 | 0.045 | 99.5 |
| 2   | 0.4 | 0.2 | 0.014 | 0.048 | 0.023 | 0.047 | 71.6 | 0.014 | 0.048 | 100  | 0.014 | 0.048 | 100  | 0.014 | 0.048 | 100  |
| 2   | 0.6 | 0.2 | 0.014 | 0.048 | 0.022 | 0.047 | 74.2 | 0.014 | 0.048 | 100  | 0.014 | 0.048 | 100  | 0.014 | 0.048 | 100  |

|   |     |     |       |       |       |       |      |       |       |      |       |       |      |       |       |      |
|---|-----|-----|-------|-------|-------|-------|------|-------|-------|------|-------|-------|------|-------|-------|------|
| 2 | 0.6 | 0.4 | 0.018 | 0.048 | 0.026 | 0.047 | 72.8 | 0.018 | 0.048 | 100  | 0.018 | 0.048 | 100  | 0.018 | 0.048 | 100  |
| 2 | 0.8 | 0.2 | 0.014 | 0.048 | 0.020 | 0.048 | 82.3 | 0.014 | 0.048 | 100  | 0.014 | 0.048 | 100  | 0.014 | 0.048 | 100  |
| 2 | 0.8 | 0.4 | 0.018 | 0.048 | 0.023 | 0.048 | 80.3 | 0.018 | 0.048 | 100  | 0.018 | 0.048 | 100  | 0.018 | 0.048 | 100  |
| 2 | 0.8 | 0.6 | 0.022 | 0.048 | 0.027 | 0.048 | 77.5 | 0.022 | 0.048 | 100  | 0.022 | 0.048 | 100  | 0.022 | 0.048 | 100  |
| 2 | 1   | 0.2 | 0.014 | 0.048 | 0.018 | 0.048 | 86.1 | 0.014 | 0.048 | 100  | 0.014 | 0.048 | 100  | 0.014 | 0.048 | 100  |
| 2 | 1   | 0.4 | 0.018 | 0.048 | 0.022 | 0.048 | 83.6 | 0.018 | 0.048 | 100  | 0.018 | 0.048 | 100  | 0.018 | 0.048 | 100  |
| 2 | 1   | 0.6 | 0.022 | 0.048 | 0.026 | 0.048 | 81.4 | 0.022 | 0.048 | 100  | 0.022 | 0.048 | 100  | 0.022 | 0.048 | 100  |
| 2 | 1   | 0.8 | 0.025 | 0.048 | 0.030 | 0.048 | 77.4 | 0.025 | 0.048 | 100  | 0.025 | 0.048 | 100  | 0.025 | 0.048 | 100  |
| 2 | 1.2 | 0.2 | 0.014 | 0.048 | 0.017 | 0.048 | 89.1 | 0.014 | 0.048 | 100  | 0.014 | 0.048 | 100  | 0.014 | 0.048 | 100  |
| 2 | 1.2 | 0.4 | 0.018 | 0.048 | 0.021 | 0.048 | 87.4 | 0.018 | 0.048 | 100  | 0.018 | 0.048 | 100  | 0.018 | 0.048 | 100  |
| 2 | 1.2 | 0.6 | 0.022 | 0.048 | 0.025 | 0.048 | 85.7 | 0.022 | 0.048 | 100  | 0.022 | 0.048 | 100  | 0.022 | 0.048 | 100  |
| 2 | 1.2 | 0.8 | 0.025 | 0.048 | 0.029 | 0.048 | 82.4 | 0.025 | 0.048 | 100  | 0.025 | 0.048 | 100  | 0.025 | 0.048 | 100  |
| 2 | 1.2 | 1   | 0.029 | 0.048 | 0.033 | 0.048 | 77.4 | 0.029 | 0.048 | 100  | 0.029 | 0.048 | 100  | 0.029 | 0.048 | 100  |
| 2 | 1.4 | 0.2 | 0.014 | 0.048 | 0.016 | 0.048 | 93.3 | 0.014 | 0.048 | 100  | 0.014 | 0.048 | 100  | 0.014 | 0.048 | 100  |
| 2 | 1.4 | 0.4 | 0.018 | 0.048 | 0.020 | 0.048 | 91.8 | 0.018 | 0.048 | 100  | 0.018 | 0.048 | 100  | 0.018 | 0.048 | 100  |
| 2 | 1.4 | 0.6 | 0.022 | 0.048 | 0.024 | 0.048 | 90.3 | 0.022 | 0.048 | 100  | 0.022 | 0.048 | 100  | 0.022 | 0.048 | 100  |
| 2 | 1.4 | 0.8 | 0.025 | 0.048 | 0.028 | 0.048 | 86.8 | 0.025 | 0.048 | 100  | 0.025 | 0.048 | 100  | 0.025 | 0.048 | 100  |
| 2 | 1.4 | 1.2 | 0.033 | 0.048 | 0.036 | 0.048 | 75.6 | 0.033 | 0.048 | 99.6 | 0.033 | 0.048 | 99.6 | 0.033 | 0.048 | 99.6 |
| 2 | 1.4 | 1   | 0.029 | 0.048 | 0.032 | 0.048 | 82.2 | 0.029 | 0.048 | 100  | 0.029 | 0.048 | 100  | 0.029 | 0.048 | 100  |
| 2 | 1.6 | 0.2 | 0.014 | 0.048 | 0.015 | 0.048 | 95.6 | 0.014 | 0.048 | 100  | 0.014 | 0.048 | 100  | 0.014 | 0.048 | 100  |
| 2 | 1.6 | 0.4 | 0.018 | 0.048 | 0.019 | 0.048 | 94   | 0.018 | 0.048 | 100  | 0.018 | 0.048 | 100  | 0.018 | 0.048 | 100  |
| 2 | 1.6 | 0.6 | 0.022 | 0.048 | 0.023 | 0.048 | 92.9 | 0.022 | 0.048 | 100  | 0.022 | 0.048 | 100  | 0.022 | 0.048 | 100  |
| 2 | 1.6 | 0.8 | 0.025 | 0.048 | 0.027 | 0.048 | 89.2 | 0.025 | 0.048 | 100  | 0.025 | 0.048 | 100  | 0.025 | 0.048 | 100  |
| 2 | 1.6 | 1.2 | 0.033 | 0.048 | 0.035 | 0.048 | 80.2 | 0.033 | 0.048 | 99.2 | 0.033 | 0.048 | 99.3 | 0.033 | 0.048 | 99.3 |
| 2 | 1.6 | 1.4 | 0.037 | 0.048 | 0.039 | 0.048 | 70.6 | 0.037 | 0.048 | 97.9 | 0.037 | 0.048 | 97.8 | 0.037 | 0.048 | 97.8 |
| 2 | 1.6 | 1   | 0.029 | 0.048 | 0.032 | 0.048 | 85.5 | 0.029 | 0.048 | 99.8 | 0.029 | 0.048 | 99.9 | 0.029 | 0.048 | 99.9 |
| 2 | 1.8 | 0.2 | 0.014 | 0.048 | 0.015 | 0.048 | 97.7 | 0.014 | 0.048 | 100  | 0.014 | 0.048 | 100  | 0.014 | 0.048 | 100  |
| 2 | 1.8 | 0.4 | 0.018 | 0.048 | 0.019 | 0.048 | 96.3 | 0.018 | 0.048 | 100  | 0.018 | 0.048 | 100  | 0.018 | 0.048 | 100  |
| 2 | 1.8 | 0.6 | 0.022 | 0.048 | 0.023 | 0.048 | 95.4 | 0.022 | 0.048 | 100  | 0.022 | 0.048 | 100  | 0.022 | 0.048 | 100  |
| 2 | 1.8 | 0.8 | 0.025 | 0.048 | 0.027 | 0.048 | 93.4 | 0.025 | 0.048 | 100  | 0.025 | 0.048 | 100  | 0.025 | 0.048 | 100  |
| 2 | 1.8 | 1.2 | 0.033 | 0.048 | 0.035 | 0.048 | 84   | 0.033 | 0.048 | 99   | 0.033 | 0.048 | 99.1 | 0.033 | 0.048 | 99.1 |
| 2 | 1.8 | 1.4 | 0.037 | 0.048 | 0.039 | 0.048 | 74.6 | 0.037 | 0.048 | 96.6 | 0.037 | 0.048 | 96.7 | 0.037 | 0.048 | 96.6 |
| 2 | 1.8 | 1.6 | 0.041 | 0.048 | 0.043 | 0.048 | 57   | 0.041 | 0.048 | 81.5 | 0.041 | 0.048 | 82.7 | 0.041 | 0.048 | 82.7 |
| 2 | 1.8 | 1   | 0.029 | 0.048 | 0.031 | 0.048 | 89.4 | 0.029 | 0.048 | 99.9 | 0.029 | 0.048 | 99.9 | 0.029 | 0.048 | 99.9 |

**Table S2.  $d_{XY}$  between  $P_2$  and  $P_3$  for different sets of windows, for models with GENE FLOW FROM  $P_2$  to  $P_3$ .**

The first three columns give the split times for the model and the time of gene flow in units of  $4N$  generations ago (see Fig. 4B). The 'Alt' and 'Bg' columns give  $d_{XY}$  between  $P_2$  and  $P_3$  for the 1000 Alternate and 9000 Background windows, respectively. For each of the introgression statistics, there are three columns giving  $d_{XY}$  between  $P_2$  and  $P_3$  for outliers (windows with the top 10% of values), non-outliers (the remaining 90% of windows) and then the percentage of the outliers that corresponded to real Alternate windows in the simulation (i.e. the level of accuracy of the statistic in identifying gene flow windows). Highlighted blocks indicate cases where  $d_{XY}$  in the Alternate or outlier windows was significantly lower than in the Background or non-outlier windows.

| $t_{23}$ | $t_{12}$ | $t_{GF}$ | Alt   | Bg    | $D$     |             |        | $f_d$   |             |        | $f_G$   |             |        | $f_{nom}$ |             |        |
|----------|----------|----------|-------|-------|---------|-------------|--------|---------|-------------|--------|---------|-------------|--------|-----------|-------------|--------|
|          |          |          |       |       | outlier | non-outlier | % cor. | outlier | non-outlier | % cor. | outlier | non-outlier | % cor. | outlier   | non-outlier | % cor. |
| 0.6      | 0.4      | 0.2      | 0.014 | 0.022 | 0.017   | 0.021       | 45.6   | 0.015   | 0.022       | 80.4   | 0.014   | 0.022       | 83.5   | 0.014     | 0.022       | 82.5   |
| 0.8      | 0.4      | 0.2      | 0.014 | 0.025 | 0.020   | 0.025       | 41.3   | 0.015   | 0.025       | 87     | 0.015   | 0.025       | 90.2   | 0.015     | 0.025       | 89.2   |
| 0.8      | 0.6      | 0.2      | 0.014 | 0.025 | 0.016   | 0.025       | 69.9   | 0.014   | 0.025       | 97.5   | 0.014   | 0.025       | 98     | 0.014     | 0.025       | 97.8   |
| 0.8      | 0.6      | 0.4      | 0.018 | 0.025 | 0.021   | 0.025       | 38.1   | 0.019   | 0.025       | 71     | 0.019   | 0.025       | 73.6   | 0.019     | 0.025       | 73.3   |
| 1        | 0.4      | 0.2      | 0.014 | 0.029 | 0.023   | 0.028       | 31.8   | 0.015   | 0.029       | 90.7   | 0.015   | 0.029       | 93     | 0.015     | 0.029       | 92.6   |
| 1        | 0.6      | 0.2      | 0.014 | 0.029 | 0.019   | 0.029       | 59.9   | 0.014   | 0.029       | 98.7   | 0.014   | 0.029       | 99     | 0.014     | 0.029       | 99     |
| 1        | 0.6      | 0.4      | 0.018 | 0.029 | 0.025   | 0.029       | 31     | 0.020   | 0.029       | 77.2   | 0.019   | 0.029       | 80.3   | 0.019     | 0.029       | 79.2   |
| 1        | 0.8      | 0.2      | 0.014 | 0.029 | 0.016   | 0.029       | 82.8   | 0.014   | 0.029       | 99.7   | 0.014   | 0.029       | 99.7   | 0.014     | 0.029       | 99.7   |
| 1        | 0.8      | 0.4      | 0.018 | 0.029 | 0.021   | 0.029       | 67     | 0.018   | 0.029       | 92.6   | 0.018   | 0.029       | 93.3   | 0.018     | 0.029       | 92.9   |
| 1        | 0.8      | 0.6      | 0.021 | 0.029 | 0.025   | 0.029       | 36.4   | 0.023   | 0.029       | 67.7   | 0.023   | 0.029       | 69.8   | 0.023     | 0.029       | 69.4   |
| 1.2      | 0.4      | 0.2      | 0.014 | 0.033 | 0.028   | 0.032       | 25.1   | 0.015   | 0.033       | 93.3   | 0.015   | 0.033       | 94.8   | 0.015     | 0.033       | 94.3   |
| 1.2      | 0.6      | 0.2      | 0.014 | 0.033 | 0.022   | 0.032       | 54     | 0.014   | 0.033       | 99.4   | 0.014   | 0.033       | 99.6   | 0.014     | 0.033       | 99.5   |
| 1.2      | 0.6      | 0.4      | 0.018 | 0.033 | 0.028   | 0.032       | 26     | 0.020   | 0.033       | 82.4   | 0.019   | 0.033       | 85.3   | 0.020     | 0.033       | 84.5   |
| 1.2      | 0.8      | 0.2      | 0.014 | 0.033 | 0.018   | 0.033       | 76.7   | 0.014   | 0.033       | 99.8   | 0.014   | 0.033       | 99.8   | 0.014     | 0.033       | 99.8   |
| 1.2      | 0.8      | 0.4      | 0.018 | 0.033 | 0.023   | 0.033       | 58.2   | 0.018   | 0.033       | 96.2   | 0.018   | 0.033       | 96.6   | 0.018     | 0.033       | 96.4   |
| 1.2      | 0.8      | 0.6      | 0.021 | 0.033 | 0.028   | 0.032       | 29.7   | 0.024   | 0.033       | 74.2   | 0.023   | 0.033       | 77     | 0.023     | 0.033       | 76.7   |
| 1.2      | 1        | 0.2      | 0.014 | 0.033 | 0.016   | 0.033       | 89.8   | 0.014   | 0.033       | 99.9   | 0.014   | 0.033       | 99.9   | 0.014     | 0.033       | 99.9   |
| 1.2      | 1        | 0.4      | 0.018 | 0.033 | 0.020   | 0.033       | 80.9   | 0.018   | 0.033       | 99.1   | 0.018   | 0.033       | 99.1   | 0.018     | 0.033       | 99.1   |
| 1.2      | 1        | 0.6      | 0.022 | 0.033 | 0.025   | 0.033       | 64.1   | 0.022   | 0.033       | 91.2   | 0.022   | 0.033       | 91.9   | 0.022     | 0.033       | 91.8   |
| 1.2      | 1        | 0.8      | 0.026 | 0.033 | 0.029   | 0.033       | 35.6   | 0.027   | 0.033       | 62.6   | 0.027   | 0.033       | 63.8   | 0.027     | 0.033       | 63.5   |
| 1.4      | 0.4      | 0.2      | 0.014 | 0.037 | 0.032   | 0.035       | 20.3   | 0.015   | 0.037       | 94.4   | 0.015   | 0.037       | 95.7   | 0.015     | 0.037       | 95.5   |
| 1.4      | 0.6      | 0.2      | 0.014 | 0.037 | 0.025   | 0.036       | 48.5   | 0.014   | 0.037       | 99.6   | 0.014   | 0.037       | 99.7   | 0.014     | 0.037       | 99.6   |
| 1.4      | 0.6      | 0.4      | 0.018 | 0.037 | 0.032   | 0.035       | 22.5   | 0.020   | 0.037       | 85.8   | 0.020   | 0.037       | 88.7   | 0.020     | 0.037       | 88.2   |
| 1.4      | 0.8      | 0.2      | 0.014 | 0.037 | 0.021   | 0.036       | 67.6   | 0.014   | 0.037       | 99.9   | 0.014   | 0.037       | 100    | 0.014     | 0.037       | 100    |
| 1.4      | 0.8      | 0.4      | 0.018 | 0.037 | 0.026   | 0.036       | 50.8   | 0.018   | 0.037       | 97.4   | 0.018   | 0.037       | 97.9   | 0.018     | 0.037       | 97.7   |
| 1.4      | 0.8      | 0.6      | 0.021 | 0.037 | 0.032   | 0.036       | 24.7   | 0.024   | 0.037       | 78.8   | 0.024   | 0.037       | 81.5   | 0.024     | 0.037       | 80.9   |
| 1.4      | 1        | 0.2      | 0.014 | 0.037 | 0.017   | 0.037       | 83.1   | 0.014   | 0.037       | 100    | 0.014   | 0.037       | 100    | 0.014     | 0.037       | 100    |
| 1.4      | 1        | 0.4      | 0.018 | 0.037 | 0.022   | 0.036       | 72.2   | 0.018   | 0.037       | 99.2   | 0.018   | 0.037       | 99.4   | 0.018     | 0.037       | 99.3   |
| 1.4      | 1        | 0.6      | 0.022 | 0.037 | 0.027   | 0.036       | 56.4   | 0.022   | 0.037       | 94.4   | 0.022   | 0.037       | 95.1   | 0.022     | 0.037       | 95.1   |
| 1.4      | 1        | 0.8      | 0.026 | 0.037 | 0.033   | 0.036       | 28.6   | 0.028   | 0.037       | 68.6   | 0.028   | 0.037       | 71.5   | 0.028     | 0.037       | 71.4   |
| 1.4      | 1.2      | 0.2      | 0.014 | 0.037 | 0.015   | 0.037       | 92.6   | 0.014   | 0.037       | 100    | 0.014   | 0.037       | 100    | 0.014     | 0.037       | 100    |
| 1.4      | 1.2      | 0.4      | 0.018 | 0.037 | 0.020   | 0.037       | 87     | 0.018   | 0.037       | 99.9   | 0.018   | 0.037       | 99.9   | 0.018     | 0.037       | 99.9   |
| 1.4      | 1.2      | 0.6      | 0.022 | 0.037 | 0.024   | 0.037       | 77.2   | 0.022   | 0.037       | 98.3   | 0.022   | 0.037       | 98.4   | 0.022     | 0.037       | 98.3   |
| 1.4      | 1.2      | 0.8      | 0.026 | 0.037 | 0.029   | 0.037       | 59.4   | 0.027   | 0.037       | 88.3   | 0.026   | 0.037       | 88.6   | 0.027     | 0.037       | 88.5   |

|     |     |     |       |       |       |       |      |       |       |      |       |       |      |       |       |      |
|-----|-----|-----|-------|-------|-------|-------|------|-------|-------|------|-------|-------|------|-------|-------|------|
| 1.4 | 1.2 | 1   | 0.029 | 0.037 | 0.033 | 0.037 | 31.4 | 0.031 | 0.037 | 57.6 | 0.031 | 0.037 | 59.4 | 0.031 | 0.037 | 59.2 |
| 1.6 | 0.4 | 0.2 | 0.014 | 0.041 | 0.035 | 0.038 | 16.6 | 0.015 | 0.041 | 95   | 0.015 | 0.041 | 96   | 0.015 | 0.041 | 95.9 |
| 1.6 | 0.6 | 0.2 | 0.014 | 0.041 | 0.029 | 0.039 | 40.7 | 0.014 | 0.041 | 99.7 | 0.014 | 0.041 | 99.9 | 0.014 | 0.041 | 99.9 |
| 1.6 | 0.6 | 0.4 | 0.018 | 0.041 | 0.036 | 0.039 | 16.8 | 0.020 | 0.041 | 87.6 | 0.020 | 0.041 | 89.9 | 0.020 | 0.041 | 89.4 |
| 1.6 | 0.8 | 0.2 | 0.014 | 0.041 | 0.023 | 0.040 | 64.1 | 0.014 | 0.041 | 99.9 | 0.014 | 0.041 | 99.9 | 0.014 | 0.041 | 99.9 |
| 1.6 | 0.8 | 0.4 | 0.018 | 0.041 | 0.029 | 0.040 | 46.5 | 0.018 | 0.041 | 98.3 | 0.018 | 0.041 | 98.9 | 0.018 | 0.041 | 98.8 |
| 1.6 | 0.8 | 0.6 | 0.021 | 0.041 | 0.036 | 0.039 | 21   | 0.024 | 0.040 | 82.4 | 0.024 | 0.041 | 85   | 0.024 | 0.041 | 84.6 |
| 1.6 | 1   | 0.2 | 0.014 | 0.041 | 0.019 | 0.040 | 78.3 | 0.014 | 0.041 | 100  | 0.014 | 0.041 | 100  | 0.014 | 0.041 | 100  |
| 1.6 | 1   | 0.4 | 0.018 | 0.041 | 0.025 | 0.040 | 67.3 | 0.018 | 0.041 | 99.7 | 0.018 | 0.041 | 99.8 | 0.018 | 0.041 | 99.8 |
| 1.6 | 1   | 0.6 | 0.022 | 0.041 | 0.030 | 0.040 | 50.6 | 0.022 | 0.041 | 96.5 | 0.022 | 0.041 | 96.8 | 0.022 | 0.041 | 96.7 |
| 1.6 | 1   | 0.8 | 0.026 | 0.041 | 0.036 | 0.040 | 25.6 | 0.029 | 0.040 | 74.6 | 0.028 | 0.040 | 76.9 | 0.028 | 0.040 | 76.7 |
| 1.6 | 1.2 | 0.2 | 0.014 | 0.041 | 0.016 | 0.041 | 90.2 | 0.014 | 0.041 | 100  | 0.014 | 0.041 | 100  | 0.014 | 0.041 | 100  |
| 1.6 | 1.2 | 0.4 | 0.018 | 0.041 | 0.021 | 0.040 | 82.7 | 0.018 | 0.041 | 100  | 0.018 | 0.041 | 100  | 0.018 | 0.041 | 100  |
| 1.6 | 1.2 | 0.6 | 0.022 | 0.041 | 0.026 | 0.040 | 73.4 | 0.022 | 0.041 | 99.3 | 0.022 | 0.041 | 99.3 | 0.022 | 0.041 | 99.2 |
| 1.6 | 1.2 | 0.8 | 0.026 | 0.041 | 0.032 | 0.040 | 54.8 | 0.027 | 0.041 | 92.1 | 0.026 | 0.041 | 92.8 | 0.027 | 0.041 | 92.6 |
| 1.6 | 1.2 | 1   | 0.029 | 0.041 | 0.037 | 0.040 | 27.1 | 0.032 | 0.040 | 66.8 | 0.032 | 0.041 | 69.6 | 0.032 | 0.041 | 68.9 |
| 1.6 | 1.4 | 0.2 | 0.014 | 0.041 | 0.015 | 0.041 | 95.4 | 0.014 | 0.041 | 100  | 0.014 | 0.041 | 100  | 0.014 | 0.041 | 100  |
| 1.6 | 1.4 | 0.4 | 0.018 | 0.041 | 0.019 | 0.041 | 92.6 | 0.018 | 0.041 | 100  | 0.018 | 0.041 | 100  | 0.018 | 0.041 | 100  |
| 1.6 | 1.4 | 0.6 | 0.021 | 0.041 | 0.024 | 0.041 | 86.3 | 0.021 | 0.041 | 99.7 | 0.021 | 0.041 | 99.7 | 0.021 | 0.041 | 99.8 |
| 1.6 | 1.4 | 0.8 | 0.025 | 0.041 | 0.028 | 0.040 | 77.9 | 0.026 | 0.041 | 97.7 | 0.026 | 0.041 | 97.7 | 0.026 | 0.041 | 97.6 |
| 1.6 | 1.4 | 1.2 | 0.033 | 0.041 | 0.037 | 0.040 | 35.6 | 0.035 | 0.041 | 58.1 | 0.035 | 0.041 | 59.2 | 0.035 | 0.041 | 59.1 |
| 1.6 | 1.4 | 1   | 0.029 | 0.041 | 0.033 | 0.040 | 61.1 | 0.030 | 0.041 | 88   | 0.030 | 0.041 | 88.5 | 0.030 | 0.041 | 88.1 |
| 1.8 | 0.4 | 0.2 | 0.014 | 0.045 | 0.040 | 0.042 | 13.4 | 0.015 | 0.044 | 95.7 | 0.015 | 0.044 | 96.5 | 0.015 | 0.044 | 96.4 |
| 1.8 | 0.6 | 0.2 | 0.014 | 0.045 | 0.032 | 0.043 | 37.2 | 0.014 | 0.045 | 99.8 | 0.014 | 0.045 | 100  | 0.014 | 0.045 | 100  |
| 1.8 | 0.6 | 0.4 | 0.018 | 0.045 | 0.040 | 0.042 | 15.5 | 0.020 | 0.044 | 89.3 | 0.020 | 0.044 | 90.7 | 0.020 | 0.044 | 90.5 |
| 1.8 | 0.8 | 0.2 | 0.014 | 0.045 | 0.026 | 0.043 | 58.1 | 0.014 | 0.045 | 100  | 0.014 | 0.045 | 100  | 0.014 | 0.045 | 100  |
| 1.8 | 0.8 | 0.4 | 0.018 | 0.045 | 0.033 | 0.043 | 41.3 | 0.018 | 0.044 | 99   | 0.018 | 0.044 | 99.1 | 0.018 | 0.044 | 99.1 |
| 1.8 | 0.8 | 0.6 | 0.021 | 0.045 | 0.040 | 0.043 | 18   | 0.024 | 0.044 | 85.2 | 0.024 | 0.044 | 87.1 | 0.024 | 0.044 | 86.7 |
| 1.8 | 1   | 0.2 | 0.014 | 0.044 | 0.021 | 0.044 | 73.9 | 0.014 | 0.044 | 100  | 0.014 | 0.044 | 100  | 0.014 | 0.044 | 100  |
| 1.8 | 1   | 0.4 | 0.018 | 0.044 | 0.027 | 0.043 | 63.3 | 0.018 | 0.044 | 99.9 | 0.018 | 0.044 | 99.9 | 0.018 | 0.044 | 99.9 |
| 1.8 | 1   | 0.6 | 0.022 | 0.044 | 0.033 | 0.043 | 45.8 | 0.022 | 0.044 | 97.3 | 0.022 | 0.044 | 97.9 | 0.022 | 0.044 | 97.7 |
| 1.8 | 1   | 0.8 | 0.026 | 0.044 | 0.040 | 0.043 | 21.6 | 0.029 | 0.044 | 78.4 | 0.029 | 0.044 | 80.9 | 0.029 | 0.044 | 80.6 |
| 1.8 | 1.2 | 0.2 | 0.014 | 0.045 | 0.018 | 0.044 | 84.4 | 0.014 | 0.045 | 100  | 0.014 | 0.045 | 100  | 0.014 | 0.045 | 100  |
| 1.8 | 1.2 | 0.4 | 0.018 | 0.045 | 0.023 | 0.044 | 77   | 0.018 | 0.045 | 100  | 0.018 | 0.045 | 100  | 0.018 | 0.045 | 100  |
| 1.8 | 1.2 | 0.6 | 0.022 | 0.045 | 0.028 | 0.044 | 67.2 | 0.022 | 0.045 | 99.5 | 0.022 | 0.045 | 99.5 | 0.022 | 0.045 | 99.5 |
| 1.8 | 1.2 | 0.8 | 0.026 | 0.045 | 0.034 | 0.044 | 49.3 | 0.027 | 0.045 | 94.2 | 0.026 | 0.045 | 95.2 | 0.026 | 0.045 | 95.2 |
| 1.8 | 1.2 | 1   | 0.029 | 0.045 | 0.040 | 0.043 | 24.6 | 0.033 | 0.044 | 72.6 | 0.032 | 0.044 | 75.6 | 0.032 | 0.044 | 75.1 |
| 1.8 | 1.4 | 0.2 | 0.014 | 0.045 | 0.016 | 0.044 | 91.6 | 0.014 | 0.045 | 100  | 0.014 | 0.045 | 100  | 0.014 | 0.045 | 100  |
| 1.8 | 1.4 | 0.4 | 0.018 | 0.045 | 0.020 | 0.044 | 89   | 0.018 | 0.045 | 100  | 0.018 | 0.045 | 100  | 0.018 | 0.045 | 100  |
| 1.8 | 1.4 | 0.6 | 0.021 | 0.045 | 0.025 | 0.044 | 83.6 | 0.021 | 0.045 | 100  | 0.021 | 0.045 | 100  | 0.021 | 0.045 | 100  |
| 1.8 | 1.4 | 0.8 | 0.025 | 0.045 | 0.030 | 0.044 | 74.5 | 0.026 | 0.045 | 98.8 | 0.026 | 0.045 | 99   | 0.026 | 0.045 | 98.9 |
| 1.8 | 1.4 | 1.2 | 0.033 | 0.045 | 0.040 | 0.044 | 32   | 0.036 | 0.044 | 66.5 | 0.036 | 0.044 | 68.8 | 0.036 | 0.044 | 68.1 |
| 1.8 | 1.4 | 1   | 0.029 | 0.045 | 0.035 | 0.044 | 57.1 | 0.030 | 0.045 | 92.8 | 0.030 | 0.045 | 93.5 | 0.030 | 0.045 | 93.3 |
| 1.8 | 1.6 | 0.2 | 0.014 | 0.045 | 0.015 | 0.044 | 96.5 | 0.014 | 0.045 | 100  | 0.014 | 0.045 | 100  | 0.014 | 0.045 | 100  |
| 1.8 | 1.6 | 0.4 | 0.018 | 0.045 | 0.019 | 0.044 | 95.2 | 0.018 | 0.045 | 100  | 0.018 | 0.045 | 100  | 0.018 | 0.045 | 100  |
| 1.8 | 1.6 | 0.6 | 0.022 | 0.045 | 0.023 | 0.044 | 91.2 | 0.022 | 0.045 | 100  | 0.022 | 0.045 | 100  | 0.022 | 0.045 | 100  |
| 1.8 | 1.6 | 0.8 | 0.025 | 0.045 | 0.027 | 0.044 | 86.2 | 0.025 | 0.045 | 99.7 | 0.025 | 0.045 | 99.7 | 0.025 | 0.045 | 99.8 |
| 1.8 | 1.6 | 1.2 | 0.033 | 0.045 | 0.036 | 0.044 | 58.1 | 0.034 | 0.044 | 87.6 | 0.034 | 0.044 | 87.5 | 0.034 | 0.044 | 87.3 |
| 1.8 | 1.6 | 1.4 | 0.037 | 0.045 | 0.040 | 0.044 | 35.5 | 0.039 | 0.044 | 58.6 | 0.039 | 0.044 | 59.3 | 0.039 | 0.044 | 59.2 |
| 1.8 | 1.6 | 1   | 0.029 | 0.045 | 0.032 | 0.044 | 76.2 | 0.029 | 0.045 | 97.3 | 0.029 | 0.045 | 97.5 | 0.029 | 0.045 | 97.5 |
| 2   | 0.4 | 0.2 | 0.014 | 0.048 | 0.044 | 0.045 | 11.9 | 0.015 | 0.048 | 95.9 | 0.015 | 0.048 | 96.6 | 0.015 | 0.048 | 96.5 |

|   |     |     |       |       |       |       |      |       |       |      |       |       |      |       |       |      |
|---|-----|-----|-------|-------|-------|-------|------|-------|-------|------|-------|-------|------|-------|-------|------|
| 2 | 0.6 | 0.2 | 0.014 | 0.048 | 0.036 | 0.046 | 34.5 | 0.014 | 0.048 | 99.9 | 0.014 | 0.048 | 100  | 0.014 | 0.048 | 100  |
| 2 | 0.6 | 0.4 | 0.018 | 0.048 | 0.044 | 0.046 | 13.6 | 0.020 | 0.048 | 90.2 | 0.020 | 0.048 | 91.6 | 0.020 | 0.048 | 91.2 |
| 2 | 0.8 | 0.2 | 0.014 | 0.048 | 0.029 | 0.047 | 54.9 | 0.014 | 0.048 | 100  | 0.014 | 0.048 | 100  | 0.014 | 0.048 | 100  |
| 2 | 0.8 | 0.4 | 0.018 | 0.048 | 0.036 | 0.046 | 37.2 | 0.018 | 0.048 | 99   | 0.018 | 0.048 | 99.2 | 0.018 | 0.048 | 99.1 |
| 2 | 0.8 | 0.6 | 0.021 | 0.048 | 0.044 | 0.046 | 14.9 | 0.025 | 0.048 | 86   | 0.024 | 0.048 | 88.3 | 0.024 | 0.048 | 87.9 |
| 2 | 1   | 0.2 | 0.014 | 0.048 | 0.024 | 0.047 | 70.3 | 0.014 | 0.048 | 100  | 0.014 | 0.048 | 100  | 0.014 | 0.048 | 100  |
| 2 | 1   | 0.4 | 0.018 | 0.048 | 0.029 | 0.047 | 59.3 | 0.018 | 0.048 | 99.9 | 0.018 | 0.048 | 99.9 | 0.018 | 0.048 | 99.9 |
| 2 | 1   | 0.6 | 0.022 | 0.048 | 0.036 | 0.047 | 41   | 0.022 | 0.048 | 97.6 | 0.022 | 0.048 | 98.1 | 0.022 | 0.048 | 98.1 |
| 2 | 1   | 0.8 | 0.026 | 0.048 | 0.043 | 0.046 | 18.7 | 0.029 | 0.048 | 80.7 | 0.029 | 0.048 | 82.5 | 0.029 | 0.048 | 82.2 |
| 2 | 1.2 | 0.2 | 0.014 | 0.048 | 0.019 | 0.048 | 82.4 | 0.014 | 0.048 | 100  | 0.014 | 0.048 | 100  | 0.014 | 0.048 | 100  |
| 2 | 1.2 | 0.4 | 0.018 | 0.048 | 0.025 | 0.048 | 73.8 | 0.018 | 0.048 | 100  | 0.018 | 0.048 | 100  | 0.018 | 0.048 | 100  |
| 2 | 1.2 | 0.6 | 0.022 | 0.048 | 0.030 | 0.047 | 63.9 | 0.022 | 0.048 | 99.6 | 0.022 | 0.048 | 99.6 | 0.022 | 0.048 | 99.6 |
| 2 | 1.2 | 0.8 | 0.026 | 0.048 | 0.037 | 0.047 | 45.2 | 0.026 | 0.048 | 95.9 | 0.026 | 0.048 | 96.3 | 0.026 | 0.048 | 96.2 |
| 2 | 1.2 | 1   | 0.029 | 0.048 | 0.044 | 0.047 | 21.2 | 0.033 | 0.048 | 76.4 | 0.033 | 0.048 | 78.3 | 0.033 | 0.048 | 78.2 |
| 2 | 1.4 | 0.2 | 0.014 | 0.048 | 0.017 | 0.048 | 89.6 | 0.014 | 0.048 | 100  | 0.014 | 0.048 | 100  | 0.014 | 0.048 | 100  |
| 2 | 1.4 | 0.4 | 0.018 | 0.048 | 0.022 | 0.048 | 85.3 | 0.018 | 0.048 | 100  | 0.018 | 0.048 | 100  | 0.018 | 0.048 | 100  |
| 2 | 1.4 | 0.6 | 0.021 | 0.048 | 0.027 | 0.048 | 78.3 | 0.021 | 0.048 | 100  | 0.021 | 0.048 | 100  | 0.021 | 0.048 | 100  |
| 2 | 1.4 | 0.8 | 0.025 | 0.048 | 0.032 | 0.048 | 67.5 | 0.026 | 0.048 | 99.4 | 0.026 | 0.048 | 99.4 | 0.026 | 0.048 | 99.4 |
| 2 | 1.4 | 1.2 | 0.033 | 0.048 | 0.043 | 0.047 | 29.3 | 0.037 | 0.048 | 71.2 | 0.036 | 0.048 | 73.3 | 0.036 | 0.048 | 73.2 |
| 2 | 1.4 | 1   | 0.029 | 0.048 | 0.037 | 0.047 | 52.1 | 0.030 | 0.048 | 94.5 | 0.030 | 0.048 | 94.9 | 0.030 | 0.048 | 94.9 |
| 2 | 1.6 | 0.2 | 0.014 | 0.048 | 0.016 | 0.048 | 94   | 0.014 | 0.048 | 100  | 0.014 | 0.048 | 100  | 0.014 | 0.048 | 100  |
| 2 | 1.6 | 0.4 | 0.018 | 0.048 | 0.020 | 0.048 | 91.5 | 0.018 | 0.048 | 100  | 0.018 | 0.048 | 100  | 0.018 | 0.048 | 100  |
| 2 | 1.6 | 0.6 | 0.022 | 0.048 | 0.025 | 0.048 | 86.9 | 0.022 | 0.048 | 100  | 0.022 | 0.048 | 100  | 0.022 | 0.048 | 100  |
| 2 | 1.6 | 0.8 | 0.025 | 0.048 | 0.029 | 0.048 | 82   | 0.025 | 0.048 | 99.7 | 0.025 | 0.048 | 99.8 | 0.025 | 0.048 | 99.8 |
| 2 | 1.6 | 1.2 | 0.033 | 0.048 | 0.039 | 0.048 | 56.2 | 0.034 | 0.048 | 91.5 | 0.034 | 0.048 | 92.1 | 0.034 | 0.048 | 92.1 |
| 2 | 1.6 | 1.4 | 0.037 | 0.048 | 0.043 | 0.048 | 33.5 | 0.040 | 0.048 | 66.5 | 0.039 | 0.048 | 68.2 | 0.039 | 0.048 | 67.7 |
| 2 | 1.6 | 1   | 0.029 | 0.048 | 0.034 | 0.048 | 71.8 | 0.029 | 0.048 | 98.5 | 0.029 | 0.048 | 98.7 | 0.029 | 0.048 | 98.7 |
| 2 | 1.8 | 0.2 | 0.014 | 0.048 | 0.015 | 0.048 | 97.2 | 0.014 | 0.048 | 100  | 0.014 | 0.048 | 100  | 0.014 | 0.048 | 100  |
| 2 | 1.8 | 0.4 | 0.018 | 0.048 | 0.019 | 0.048 | 95.9 | 0.018 | 0.048 | 100  | 0.018 | 0.048 | 100  | 0.018 | 0.048 | 100  |
| 2 | 1.8 | 0.6 | 0.022 | 0.048 | 0.023 | 0.048 | 93.7 | 0.022 | 0.048 | 100  | 0.022 | 0.048 | 100  | 0.022 | 0.048 | 100  |
| 2 | 1.8 | 0.8 | 0.026 | 0.048 | 0.027 | 0.048 | 89.6 | 0.026 | 0.048 | 100  | 0.026 | 0.048 | 100  | 0.026 | 0.048 | 100  |
| 2 | 1.8 | 1.2 | 0.033 | 0.048 | 0.036 | 0.048 | 74.7 | 0.034 | 0.048 | 96.7 | 0.034 | 0.048 | 96.5 | 0.034 | 0.048 | 96.5 |
| 2 | 1.8 | 1.4 | 0.037 | 0.048 | 0.041 | 0.048 | 56.7 | 0.038 | 0.048 | 83.2 | 0.038 | 0.048 | 83.5 | 0.038 | 0.048 | 83.3 |
| 2 | 1.8 | 1.6 | 0.041 | 0.048 | 0.044 | 0.048 | 33.7 | 0.043 | 0.048 | 56.3 | 0.043 | 0.048 | 57.1 | 0.043 | 0.048 | 57.2 |
| 2 | 1.8 | 1   | 0.029 | 0.048 | 0.032 | 0.048 | 85.4 | 0.029 | 0.048 | 99.7 | 0.029 | 0.048 | 99.5 | 0.029 | 0.048 | 99.5 |

**Table S3.  $d_{XY}$  between  $P_2$  and  $P_3$  for different sets of windows, for models with ANCESTRAL STRUCTURE**

The first three columns give the split times for the model in units of  $4N$  generations ago (see Fig. 4C). The 'Alt' and 'Bg' columns give  $d_{XY}$  between  $P_2$  and  $P_3$  for the 1000 Alternate and 9000 Background windows, respectively. For each of the introgression statistics, there are three columns giving  $d_{XY}$  between  $P_2$  and  $P_3$  for outliers (windows with the top 10% of values), non-outliers (the remaining 90% of windows) and then the percentage of the outliers that corresponded to real Alternate windows in the simulation (i.e. the level of accuracy of the statistic in identifying structure windows). Highlighted blocks indicate cases where  $d_{XY}$  in the Alternate or outlier windows was significantly lower than in the Background or non-outlier windows.

| $t_{23}$ | $t_{12}$ | $t_{STR}$ | Alt   | Bg    | $D$          |             |        | $f_d$        |             |        | $f_G$        |             |        | $f_{nom}$    |             |        |
|----------|----------|-----------|-------|-------|--------------|-------------|--------|--------------|-------------|--------|--------------|-------------|--------|--------------|-------------|--------|
|          |          |           |       |       | outlier      | non-outlier | % cor. | outlier      | non-outlier | % cor. | outlier      | non-outlier | % cor. | outlier      | non-outlier | % cor. |
| 0.4      | 0.2      | 0.6       | 0.018 | 0.018 | <b>0.017</b> | 0.018       | 52.8   | <b>0.017</b> | 0.018       | 58.9   | <b>0.017</b> | 0.018       | 61     | <b>0.017</b> | 0.018       | 63.4   |
| 0.4      | 0.2      | 0.8       | 0.018 | 0.018 | <b>0.017</b> | 0.018       | 80.2   | <b>0.017</b> | 0.018       | 82.9   | <b>0.017</b> | 0.018       | 82.7   | <b>0.017</b> | 0.018       | 85.6   |
| 0.4      | 0.2      | 1         | 0.018 | 0.018 | <b>0.017</b> | 0.018       | 92.4   | <b>0.017</b> | 0.018       | 93.5   | <b>0.017</b> | 0.018       | 92.3   | <b>0.017</b> | 0.018       | 94.7   |
| 0.4      | 0.2      | 1.2       | 0.018 | 0.018 | 0.018        | 0.018       | 97     | 0.018        | 0.018       | 97.9   | 0.017        | 0.018       | 95.5   | 0.018        | 0.018       | 97.9   |
| 0.4      | 0.2      | 1.4       | 0.018 | 0.018 | 0.018        | 0.018       | 98.9   | 0.018        | 0.018       | 99.2   | 0.018        | 0.018       | 97.2   | 0.018        | 0.018       | 99.3   |
| 0.4      | 0.2      | 1.6       | 0.018 | 0.018 | 0.018        | 0.018       | 99.5   | 0.018        | 0.018       | 99.7   | 0.018        | 0.018       | 98.4   | 0.018        | 0.018       | 99.6   |
| 0.4      | 0.2      | 1.8       | 0.018 | 0.018 | 0.018        | 0.018       | 99.8   | 0.018        | 0.018       | 100    | 0.018        | 0.018       | 98.9   | 0.018        | 0.018       | 99.8   |
| 0.4      | 0.2      | 2         | 0.018 | 0.018 | 0.018        | 0.018       | 99.8   | 0.018        | 0.018       | 99.9   | 0.018        | 0.018       | 99     | 0.018        | 0.018       | 99.8   |
| 0.6      | 0.2      | 0.8       | 0.021 | 0.022 | <b>0.021</b> | 0.022       | 47.2   | <b>0.021</b> | 0.022       | 65.6   | <b>0.021</b> | 0.022       | 70.9   | <b>0.021</b> | 0.022       | 71.2   |
| 0.6      | 0.2      | 1         | 0.022 | 0.022 | <b>0.021</b> | 0.022       | 73.2   | <b>0.021</b> | 0.022       | 86.7   | <b>0.021</b> | 0.022       | 90     | <b>0.021</b> | 0.022       | 90.9   |
| 0.6      | 0.2      | 1.2       | 0.022 | 0.022 | <b>0.021</b> | 0.022       | 87.8   | 0.021        | 0.022       | 96     | 0.021        | 0.022       | 96.9   | 0.021        | 0.022       | 97.2   |
| 0.6      | 0.2      | 1.4       | 0.021 | 0.022 | <b>0.021</b> | 0.022       | 93.6   | 0.021        | 0.022       | 98.5   | 0.021        | 0.022       | 98.6   | 0.021        | 0.022       | 99.1   |
| 0.6      | 0.2      | 1.6       | 0.022 | 0.022 | 0.021        | 0.022       | 96.6   | 0.022        | 0.022       | 99.4   | 0.022        | 0.022       | 99.6   | 0.022        | 0.022       | 99.6   |
| 0.6      | 0.2      | 1.8       | 0.022 | 0.022 | 0.021        | 0.022       | 98     | 0.022        | 0.022       | 99.7   | 0.022        | 0.022       | 99.8   | 0.022        | 0.022       | 99.9   |
| 0.6      | 0.2      | 2         | 0.022 | 0.022 | 0.022        | 0.022       | 98.6   | 0.022        | 0.022       | 99.9   | 0.022        | 0.022       | 100    | 0.022        | 0.022       | 100    |
| 0.6      | 0.4      | 0.8       | 0.021 | 0.022 | <b>0.020</b> | 0.022       | 44.1   | <b>0.020</b> | 0.022       | 55.8   | <b>0.020</b> | 0.022       | 59.3   | <b>0.020</b> | 0.022       | 59.7   |
| 0.6      | 0.4      | 1         | 0.022 | 0.022 | <b>0.021</b> | 0.022       | 70.8   | <b>0.021</b> | 0.022       | 80.4   | <b>0.021</b> | 0.022       | 80.9   | <b>0.021</b> | 0.022       | 82     |
| 0.6      | 0.4      | 1.2       | 0.022 | 0.022 | <b>0.021</b> | 0.022       | 86.1   | <b>0.021</b> | 0.022       | 92.3   | <b>0.021</b> | 0.022       | 92.7   | <b>0.021</b> | 0.022       | 93.3   |
| 0.6      | 0.4      | 1.4       | 0.021 | 0.022 | <b>0.021</b> | 0.022       | 92.5   | <b>0.021</b> | 0.022       | 96.9   | <b>0.021</b> | 0.022       | 96.6   | <b>0.021</b> | 0.022       | 97.3   |
| 0.6      | 0.4      | 1.6       | 0.022 | 0.022 | 0.021        | 0.022       | 96.1   | 0.022        | 0.022       | 98.8   | 0.021        | 0.022       | 98.3   | 0.022        | 0.022       | 98.8   |
| 0.6      | 0.4      | 1.8       | 0.022 | 0.022 | 0.021        | 0.022       | 97.5   | 0.021        | 0.022       | 99.4   | 0.021        | 0.022       | 99.1   | 0.021        | 0.022       | 99.4   |
| 0.6      | 0.4      | 2         | 0.022 | 0.022 | 0.022        | 0.022       | 98.4   | 0.022        | 0.022       | 99.8   | 0.022        | 0.022       | 99.3   | 0.022        | 0.022       | 99.6   |
| 0.8      | 0.2      | 1         | 0.026 | 0.025 | <b>0.025</b> | 0.026       | 39.2   | <b>0.025</b> | 0.026       | 65.9   | <b>0.025</b> | 0.026       | 72.2   | <b>0.025</b> | 0.026       | 72.6   |
| 0.8      | 0.2      | 1.2       | 0.026 | 0.025 | <b>0.025</b> | 0.026       | 64.3   | 0.025        | 0.026       | 88.1   | 0.025        | 0.026       | 91.5   | 0.025        | 0.026       | 91.6   |
| 0.8      | 0.2      | 1.4       | 0.025 | 0.025 | <b>0.025</b> | 0.026       | 80.8   | 0.025        | 0.026       | 96.8   | 0.025        | 0.026       | 97.8   | 0.025        | 0.026       | 98     |
| 0.8      | 0.2      | 1.6       | 0.025 | 0.025 | <b>0.025</b> | 0.026       | 87.3   | 0.025        | 0.026       | 98.7   | 0.025        | 0.025       | 99.5   | 0.025        | 0.025       | 99.5   |
| 0.8      | 0.2      | 1.8       | 0.026 | 0.025 | 0.025        | 0.026       | 91.7   | 0.026        | 0.025       | 99.6   | 0.026        | 0.025       | 99.7   | 0.026        | 0.025       | 99.7   |
| 0.8      | 0.2      | 2         | 0.025 | 0.025 | <b>0.025</b> | 0.026       | 94.3   | 0.025        | 0.025       | 99.6   | 0.025        | 0.025       | 99.7   | 0.025        | 0.025       | 99.7   |
| 0.8      | 0.4      | 1         | 0.026 | 0.025 | <b>0.024</b> | 0.026       | 38.7   | <b>0.025</b> | 0.026       | 59.7   | <b>0.025</b> | 0.026       | 63.7   | <b>0.025</b> | 0.026       | 63.6   |
| 0.8      | 0.4      | 1.2       | 0.026 | 0.025 | <b>0.025</b> | 0.026       | 64.5   | <b>0.025</b> | 0.026       | 84.4   | <b>0.025</b> | 0.026       | 86.5   | 0.025        | 0.026       | 87.4   |
| 0.8      | 0.4      | 1.4       | 0.025 | 0.025 | <b>0.025</b> | 0.026       | 81.1   | 0.025        | 0.025       | 95     | 0.025        | 0.025       | 96.1   | 0.025        | 0.025       | 96.4   |
| 0.8      | 0.4      | 1.6       | 0.025 | 0.025 | <b>0.025</b> | 0.026       | 87.5   | 0.025        | 0.025       | 98     | 0.025        | 0.025       | 98.2   | 0.025        | 0.025       | 98.4   |
| 0.8      | 0.4      | 1.8       | 0.026 | 0.025 | 0.025        | 0.025       | 91.8   | 0.026        | 0.025       | 99.5   | 0.025        | 0.025       | 99.3   | 0.026        | 0.025       | 99.6   |
| 0.8      | 0.4      | 2         | 0.025 | 0.025 | <b>0.025</b> | 0.025       | 95.1   | 0.025        | 0.025       | 99.8   | 0.025        | 0.025       | 99.7   | 0.025        | 0.025       | 99.7   |
| 0.8      | 0.6      | 1         | 0.026 | 0.025 | <b>0.024</b> | 0.026       | 38.5   | <b>0.024</b> | 0.026       | 52.5   | <b>0.024</b> | 0.026       | 53.9   | <b>0.024</b> | 0.026       | 54.7   |
| 0.8      | 0.6      | 1.2       | 0.026 | 0.025 | <b>0.025</b> | 0.026       | 64.9   | <b>0.025</b> | 0.026       | 80     | <b>0.025</b> | 0.026       | 80.1   | <b>0.025</b> | 0.026       | 81.7   |

|     |     |     |       |       |              |       |      |              |       |      |              |       |      |              |       |      |
|-----|-----|-----|-------|-------|--------------|-------|------|--------------|-------|------|--------------|-------|------|--------------|-------|------|
| 0.8 | 0.6 | 1.4 | 0.025 | 0.025 | <b>0.025</b> | 0.026 | 81.9 | <b>0.025</b> | 0.026 | 92.3 | <b>0.025</b> | 0.026 | 92.5 | <b>0.025</b> | 0.026 | 93.3 |
| 0.8 | 0.6 | 1.6 | 0.025 | 0.025 | <b>0.025</b> | 0.026 | 89.7 | <b>0.025</b> | 0.026 | 96.8 | <b>0.025</b> | 0.026 | 96.4 | <b>0.025</b> | 0.026 | 97.1 |
| 0.8 | 0.6 | 1.8 | 0.026 | 0.025 | 0.025        | 0.026 | 94   | 0.025        | 0.026 | 98.9 | 0.025        | 0.026 | 98.8 | 0.025        | 0.026 | 99   |
| 0.8 | 0.6 | 2   | 0.025 | 0.025 | <b>0.025</b> | 0.026 | 96.3 | 0.025        | 0.026 | 99.6 | 0.025        | 0.026 | 99.1 | 0.025        | 0.026 | 99.3 |
| 1   | 0.2 | 1.2 | 0.029 | 0.029 | <b>0.028</b> | 0.029 | 29   | <b>0.029</b> | 0.029 | 68.1 | <b>0.029</b> | 0.029 | 75.5 | <b>0.029</b> | 0.029 | 75.5 |
| 1   | 0.2 | 1.4 | 0.029 | 0.029 | <b>0.028</b> | 0.029 | 57.7 | <b>0.029</b> | 0.029 | 91.4 | 0.029        | 0.029 | 93.9 | 0.029        | 0.029 | 94.1 |
| 1   | 0.2 | 1.6 | 0.029 | 0.029 | <b>0.029</b> | 0.029 | 72.7 | 0.029        | 0.029 | 97.3 | 0.029        | 0.029 | 98.5 | 0.029        | 0.029 | 98.7 |
| 1   | 0.2 | 1.8 | 0.029 | 0.029 | <b>0.029</b> | 0.029 | 82.2 | 0.029        | 0.029 | 99.3 | 0.029        | 0.029 | 99.8 | 0.029        | 0.029 | 99.8 |
| 1   | 0.2 | 2   | 0.029 | 0.029 | <b>0.029</b> | 0.029 | 86.8 | 0.029        | 0.029 | 99.8 | 0.029        | 0.029 | 99.9 | 0.029        | 0.029 | 99.9 |
| 1   | 0.4 | 1.2 | 0.029 | 0.029 | <b>0.028</b> | 0.029 | 28   | <b>0.029</b> | 0.029 | 63.6 | <b>0.029</b> | 0.029 | 69   | <b>0.029</b> | 0.029 | 69.3 |
| 1   | 0.4 | 1.4 | 0.029 | 0.029 | <b>0.028</b> | 0.029 | 55.3 | <b>0.029</b> | 0.029 | 87.9 | 0.029        | 0.029 | 91.8 | 0.029        | 0.029 | 92.2 |
| 1   | 0.4 | 1.6 | 0.029 | 0.029 | <b>0.028</b> | 0.029 | 70.8 | 0.029        | 0.029 | 96.4 | 0.029        | 0.029 | 97.4 | 0.029        | 0.029 | 97.6 |
| 1   | 0.4 | 1.8 | 0.029 | 0.029 | <b>0.029</b> | 0.029 | 79.9 | 0.029        | 0.029 | 98.7 | 0.029        | 0.029 | 99.5 | 0.029        | 0.029 | 99.5 |
| 1   | 0.4 | 2   | 0.029 | 0.029 | <b>0.029</b> | 0.029 | 85.7 | 0.029        | 0.029 | 99.6 | 0.029        | 0.029 | 99.7 | 0.029        | 0.029 | 99.9 |
| 1   | 0.6 | 1.2 | 0.029 | 0.029 | <b>0.028</b> | 0.029 | 28.8 | <b>0.028</b> | 0.029 | 55.8 | <b>0.028</b> | 0.029 | 59.7 | <b>0.028</b> | 0.029 | 60   |
| 1   | 0.6 | 1.4 | 0.029 | 0.029 | <b>0.028</b> | 0.029 | 57.3 | <b>0.029</b> | 0.029 | 82.1 | <b>0.029</b> | 0.029 | 85.8 | <b>0.029</b> | 0.029 | 86.4 |
| 1   | 0.6 | 1.6 | 0.029 | 0.029 | <b>0.028</b> | 0.029 | 73.2 | <b>0.029</b> | 0.029 | 94.5 | 0.029        | 0.029 | 95.5 | 0.029        | 0.029 | 95.8 |
| 1   | 0.6 | 1.8 | 0.029 | 0.029 | <b>0.029</b> | 0.029 | 82.9 | 0.029        | 0.029 | 97.9 | 0.029        | 0.029 | 98.4 | 0.029        | 0.029 | 98.5 |
| 1   | 0.6 | 2   | 0.029 | 0.029 | <b>0.029</b> | 0.029 | 88.6 | 0.029        | 0.029 | 99.2 | 0.029        | 0.029 | 99.2 | 0.029        | 0.029 | 99.3 |
| 1   | 0.8 | 1.2 | 0.029 | 0.029 | <b>0.028</b> | 0.030 | 32.7 | <b>0.028</b> | 0.029 | 49.9 | <b>0.028</b> | 0.029 | 51.9 | <b>0.028</b> | 0.029 | 52.6 |
| 1   | 0.8 | 1.4 | 0.029 | 0.029 | <b>0.028</b> | 0.029 | 61.8 | <b>0.028</b> | 0.029 | 78.1 | <b>0.028</b> | 0.029 | 79   | <b>0.028</b> | 0.029 | 79.7 |
| 1   | 0.8 | 1.6 | 0.029 | 0.029 | <b>0.029</b> | 0.029 | 78.5 | <b>0.029</b> | 0.029 | 92.1 | <b>0.029</b> | 0.029 | 91.6 | <b>0.029</b> | 0.029 | 92   |
| 1   | 0.8 | 1.8 | 0.029 | 0.029 | <b>0.029</b> | 0.029 | 87.6 | 0.029        | 0.029 | 96.6 | 0.029        | 0.029 | 96.6 | 0.029        | 0.029 | 96.7 |
| 1   | 0.8 | 2   | 0.029 | 0.029 | <b>0.029</b> | 0.029 | 91.4 | 0.029        | 0.029 | 98.6 | 0.029        | 0.029 | 98.5 | 0.029        | 0.029 | 98.7 |
| 1.2 | 0.2 | 1.4 | 0.033 | 0.033 | <b>0.032</b> | 0.033 | 26.3 | <b>0.032</b> | 0.033 | 71.9 | <b>0.032</b> | 0.033 | 77.8 | <b>0.032</b> | 0.033 | 78   |
| 1.2 | 0.2 | 1.6 | 0.033 | 0.033 | <b>0.032</b> | 0.033 | 47   | <b>0.033</b> | 0.033 | 92.4 | <b>0.033</b> | 0.033 | 95.3 | <b>0.033</b> | 0.033 | 95.3 |
| 1.2 | 0.2 | 1.8 | 0.033 | 0.033 | <b>0.033</b> | 0.033 | 61.6 | 0.033        | 0.033 | 98   | 0.033        | 0.033 | 98.9 | 0.033        | 0.033 | 99   |
| 1.2 | 0.2 | 2   | 0.033 | 0.033 | <b>0.033</b> | 0.033 | 72.9 | 0.033        | 0.033 | 99.4 | 0.033        | 0.033 | 99.7 | 0.033        | 0.033 | 99.8 |
| 1.2 | 0.4 | 1.4 | 0.033 | 0.033 | <b>0.032</b> | 0.033 | 26.4 | <b>0.032</b> | 0.033 | 66.5 | <b>0.032</b> | 0.033 | 73.1 | <b>0.032</b> | 0.033 | 72.9 |
| 1.2 | 0.4 | 1.6 | 0.033 | 0.033 | <b>0.032</b> | 0.033 | 48.1 | <b>0.033</b> | 0.033 | 90.5 | <b>0.033</b> | 0.033 | 93   | <b>0.033</b> | 0.033 | 93.4 |
| 1.2 | 0.4 | 1.8 | 0.033 | 0.033 | <b>0.032</b> | 0.033 | 62.6 | 0.033        | 0.033 | 96.8 | 0.033        | 0.033 | 97.9 | 0.033        | 0.033 | 98.1 |
| 1.2 | 0.4 | 2   | 0.033 | 0.033 | <b>0.032</b> | 0.033 | 73.1 | 0.033        | 0.033 | 99.1 | 0.033        | 0.033 | 99.4 | 0.033        | 0.033 | 99.4 |
| 1.2 | 0.6 | 1.4 | 0.033 | 0.033 | <b>0.032</b> | 0.033 | 27.4 | <b>0.032</b> | 0.033 | 61.7 | <b>0.032</b> | 0.033 | 66.9 | <b>0.032</b> | 0.033 | 66.9 |
| 1.2 | 0.6 | 1.6 | 0.033 | 0.033 | <b>0.032</b> | 0.033 | 49.5 | <b>0.032</b> | 0.033 | 88   | <b>0.033</b> | 0.033 | 90.6 | <b>0.033</b> | 0.033 | 90.4 |
| 1.2 | 0.6 | 1.8 | 0.033 | 0.033 | <b>0.032</b> | 0.033 | 64.5 | 0.033        | 0.033 | 95.7 | 0.033        | 0.033 | 96.9 | 0.033        | 0.033 | 97   |
| 1.2 | 0.6 | 2   | 0.033 | 0.033 | <b>0.032</b> | 0.033 | 75.8 | 0.033        | 0.033 | 98.7 | 0.033        | 0.033 | 99.1 | 0.033        | 0.033 | 99.2 |
| 1.2 | 0.8 | 1.4 | 0.033 | 0.033 | <b>0.032</b> | 0.033 | 30.6 | <b>0.032</b> | 0.033 | 56.7 | <b>0.032</b> | 0.033 | 59.4 | <b>0.032</b> | 0.033 | 59.8 |
| 1.2 | 0.8 | 1.6 | 0.033 | 0.033 | <b>0.032</b> | 0.033 | 53.3 | <b>0.032</b> | 0.033 | 83.9 | <b>0.032</b> | 0.033 | 86.1 | <b>0.032</b> | 0.033 | 86.4 |
| 1.2 | 0.8 | 1.8 | 0.033 | 0.033 | <b>0.032</b> | 0.033 | 69.7 | 0.033        | 0.033 | 94.3 | 0.033        | 0.033 | 94.8 | 0.033        | 0.033 | 95   |
| 1.2 | 0.8 | 2   | 0.033 | 0.033 | <b>0.032</b> | 0.033 | 81.2 | 0.033        | 0.033 | 97.9 | 0.033        | 0.033 | 98.5 | 0.033        | 0.033 | 98.5 |
| 1.2 | 1   | 1.4 | 0.033 | 0.033 | <b>0.032</b> | 0.033 | 36   | <b>0.032</b> | 0.033 | 52.4 | <b>0.032</b> | 0.033 | 52.7 | <b>0.032</b> | 0.033 | 52.8 |
| 1.2 | 1   | 1.6 | 0.033 | 0.033 | <b>0.032</b> | 0.033 | 60.9 | <b>0.032</b> | 0.033 | 80   | <b>0.032</b> | 0.033 | 81.2 | <b>0.032</b> | 0.033 | 81.6 |
| 1.2 | 1   | 1.8 | 0.033 | 0.033 | <b>0.032</b> | 0.033 | 75.5 | 0.033        | 0.033 | 91.8 | 0.033        | 0.033 | 91.6 | 0.033        | 0.033 | 92.4 |
| 1.2 | 1   | 2   | 0.033 | 0.033 | <b>0.033</b> | 0.033 | 85.4 | 0.033        | 0.033 | 97.4 | 0.033        | 0.033 | 97.1 | 0.033        | 0.033 | 97.4 |
| 1.4 | 0.2 | 1.6 | 0.037 | 0.037 | <b>0.036</b> | 0.037 | 22.4 | <b>0.036</b> | 0.037 | 74.8 | <b>0.036</b> | 0.037 | 80.3 | <b>0.036</b> | 0.037 | 80.3 |
| 1.4 | 0.2 | 1.8 | 0.037 | 0.037 | <b>0.036</b> | 0.037 | 40.5 | <b>0.037</b> | 0.037 | 91.6 | 0.037        | 0.037 | 94.7 | 0.037        | 0.037 | 94.8 |
| 1.4 | 0.2 | 2   | 0.037 | 0.037 | <b>0.036</b> | 0.037 | 56.3 | 0.037        | 0.037 | 98.8 | 0.037        | 0.037 | 99.5 | 0.037        | 0.037 | 99.5 |
| 1.4 | 0.4 | 1.6 | 0.037 | 0.037 | <b>0.036</b> | 0.037 | 23.3 | <b>0.036</b> | 0.037 | 71.5 | <b>0.036</b> | 0.037 | 76.6 | <b>0.036</b> | 0.037 | 76.6 |
| 1.4 | 0.4 | 1.8 | 0.037 | 0.037 | <b>0.036</b> | 0.037 | 40.8 | <b>0.036</b> | 0.037 | 89.7 | <b>0.037</b> | 0.037 | 92.6 | <b>0.037</b> | 0.037 | 92.7 |
| 1.4 | 0.4 | 2   | 0.037 | 0.037 | <b>0.036</b> | 0.037 | 57   | 0.037        | 0.037 | 98.4 | 0.037        | 0.037 | 99   | 0.037        | 0.037 | 98.8 |
| 1.4 | 0.6 | 1.6 | 0.037 | 0.037 | <b>0.036</b> | 0.037 | 24.8 | <b>0.036</b> | 0.037 | 67.5 | <b>0.036</b> | 0.037 | 72.9 | <b>0.036</b> | 0.037 | 72.6 |



|     |     |     |       |       |              |       |      |              |       |      |              |       |      |              |       |      |
|-----|-----|-----|-------|-------|--------------|-------|------|--------------|-------|------|--------------|-------|------|--------------|-------|------|
| 1.4 | 0.6 | 1.8 | 0.037 | 0.037 | <b>0.036</b> | 0.037 | 42.9 | <b>0.036</b> | 0.037 | 86.9 | <b>0.036</b> | 0.037 | 90.7 | <b>0.036</b> | 0.037 | 90.4 |
| 1.4 | 0.6 | 2   | 0.037 | 0.037 | <b>0.036</b> | 0.037 | 59.1 | <b>0.037</b> | 0.037 | 97.6 | 0.037        | 0.037 | 98.5 | 0.037        | 0.037 | 98.5 |
| 1.4 | 0.8 | 1.6 | 0.037 | 0.037 | <b>0.036</b> | 0.037 | 26.3 | <b>0.036</b> | 0.037 | 62   | <b>0.036</b> | 0.037 | 66.2 | <b>0.036</b> | 0.037 | 66.2 |
| 1.4 | 0.8 | 1.8 | 0.037 | 0.037 | <b>0.036</b> | 0.037 | 45   | <b>0.036</b> | 0.037 | 82.9 | <b>0.036</b> | 0.037 | 85.3 | <b>0.036</b> | 0.037 | 85.4 |
| 1.4 | 0.8 | 2   | 0.037 | 0.037 | <b>0.036</b> | 0.037 | 61.2 | <b>0.036</b> | 0.037 | 96.1 | <b>0.037</b> | 0.037 | 97.3 | <b>0.037</b> | 0.037 | 97.5 |
| 1.4 | 1   | 1.6 | 0.037 | 0.037 | <b>0.036</b> | 0.037 | 29.8 | <b>0.036</b> | 0.037 | 56.9 | <b>0.036</b> | 0.037 | 60.1 | <b>0.036</b> | 0.037 | 60   |
| 1.4 | 1   | 1.8 | 0.037 | 0.037 | <b>0.036</b> | 0.037 | 49.7 | <b>0.036</b> | 0.037 | 80.3 | <b>0.036</b> | 0.037 | 82.2 | <b>0.036</b> | 0.037 | 82.6 |
| 1.4 | 1   | 2   | 0.037 | 0.037 | <b>0.036</b> | 0.037 | 67.3 | <b>0.036</b> | 0.037 | 95   | <b>0.036</b> | 0.037 | 95.9 | <b>0.036</b> | 0.037 | 96.1 |
| 1.4 | 1.2 | 1.6 | 0.037 | 0.037 | <b>0.035</b> | 0.037 | 35.3 | <b>0.035</b> | 0.037 | 50.6 | <b>0.035</b> | 0.037 | 52.5 | <b>0.035</b> | 0.037 | 52.6 |
| 1.4 | 1.2 | 1.8 | 0.037 | 0.037 | <b>0.036</b> | 0.037 | 55.4 | <b>0.036</b> | 0.037 | 74.9 | <b>0.036</b> | 0.037 | 76.8 | <b>0.036</b> | 0.037 | 76.7 |
| 1.4 | 1.2 | 2   | 0.037 | 0.037 | <b>0.036</b> | 0.037 | 73.4 | <b>0.036</b> | 0.037 | 91.8 | <b>0.036</b> | 0.037 | 91.9 | <b>0.036</b> | 0.037 | 92.3 |
| 1.6 | 0.2 | 1.8 | 0.041 | 0.041 | <b>0.040</b> | 0.041 | 19.9 | <b>0.040</b> | 0.041 | 75.6 | <b>0.040</b> | 0.041 | 80   | <b>0.040</b> | 0.041 | 80   |
| 1.6 | 0.2 | 2   | 0.041 | 0.041 | <b>0.040</b> | 0.041 | 36.9 | 0.040        | 0.041 | 93.3 | 0.041        | 0.041 | 95.8 | 0.041        | 0.041 | 95.9 |
| 1.6 | 0.4 | 1.8 | 0.041 | 0.041 | <b>0.040</b> | 0.041 | 19.3 | <b>0.040</b> | 0.041 | 72.2 | <b>0.040</b> | 0.041 | 76.5 | <b>0.040</b> | 0.041 | 76.5 |
| 1.6 | 0.4 | 2   | 0.041 | 0.041 | <b>0.040</b> | 0.041 | 34.9 | 0.040        | 0.041 | 91.4 | 0.040        | 0.041 | 93.9 | 0.040        | 0.041 | 93.8 |
| 1.6 | 0.6 | 1.8 | 0.041 | 0.041 | <b>0.040</b> | 0.041 | 18.5 | <b>0.040</b> | 0.041 | 68.7 | <b>0.040</b> | 0.041 | 73.6 | <b>0.040</b> | 0.041 | 73.6 |
| 1.6 | 0.6 | 2   | 0.041 | 0.041 | <b>0.040</b> | 0.041 | 35   | <b>0.040</b> | 0.041 | 89.2 | <b>0.040</b> | 0.041 | 91.6 | <b>0.040</b> | 0.041 | 91.6 |
| 1.6 | 0.8 | 1.8 | 0.041 | 0.041 | <b>0.040</b> | 0.041 | 23   | <b>0.040</b> | 0.041 | 65.5 | <b>0.040</b> | 0.041 | 69.6 | <b>0.040</b> | 0.041 | 69.6 |
| 1.6 | 0.8 | 2   | 0.041 | 0.041 | <b>0.040</b> | 0.041 | 40.7 | <b>0.040</b> | 0.041 | 88   | <b>0.040</b> | 0.041 | 90.2 | <b>0.040</b> | 0.041 | 90.3 |
| 1.6 | 1   | 1.8 | 0.041 | 0.041 | <b>0.040</b> | 0.041 | 26   | <b>0.040</b> | 0.041 | 61.5 | <b>0.040</b> | 0.041 | 65.2 | <b>0.040</b> | 0.041 | 65.3 |
| 1.6 | 1   | 2   | 0.041 | 0.041 | <b>0.040</b> | 0.041 | 45.2 | <b>0.040</b> | 0.041 | 85.2 | <b>0.040</b> | 0.041 | 87.7 | <b>0.040</b> | 0.041 | 87.7 |
| 1.6 | 1.2 | 1.8 | 0.041 | 0.041 | <b>0.040</b> | 0.041 | 29.5 | <b>0.040</b> | 0.041 | 56.3 | <b>0.040</b> | 0.041 | 59.1 | <b>0.040</b> | 0.041 | 59.4 |
| 1.6 | 1.2 | 2   | 0.041 | 0.041 | <b>0.040</b> | 0.041 | 50.9 | <b>0.040</b> | 0.041 | 82.1 | <b>0.040</b> | 0.041 | 84.4 | <b>0.040</b> | 0.041 | 84.4 |
| 1.6 | 1.4 | 1.8 | 0.041 | 0.041 | <b>0.039</b> | 0.041 | 33.5 | <b>0.039</b> | 0.041 | 49.9 | <b>0.039</b> | 0.041 | 51.1 | <b>0.039</b> | 0.041 | 51   |
| 1.6 | 1.4 | 2   | 0.041 | 0.041 | <b>0.040</b> | 0.041 | 57.2 | <b>0.040</b> | 0.041 | 76.5 | <b>0.040</b> | 0.041 | 77.4 | <b>0.040</b> | 0.041 | 77.8 |
| 1.8 | 0.2 | 2   | 0.045 | 0.044 | 0.044        | 0.045 | 14.5 | <b>0.044</b> | 0.045 | 75.6 | <b>0.044</b> | 0.045 | 80.9 | <b>0.044</b> | 0.045 | 81   |
| 1.8 | 0.4 | 2   | 0.045 | 0.045 | <b>0.044</b> | 0.045 | 14.3 | <b>0.044</b> | 0.045 | 72.5 | <b>0.044</b> | 0.045 | 77.9 | <b>0.044</b> | 0.045 | 77.9 |
| 1.8 | 0.6 | 2   | 0.045 | 0.045 | <b>0.044</b> | 0.045 | 14.6 | <b>0.044</b> | 0.045 | 70   | <b>0.044</b> | 0.045 | 74.9 | <b>0.044</b> | 0.045 | 75   |
| 1.8 | 0.8 | 2   | 0.045 | 0.045 | <b>0.044</b> | 0.045 | 16.8 | <b>0.044</b> | 0.045 | 68.1 | <b>0.044</b> | 0.045 | 72.5 | <b>0.044</b> | 0.045 | 72.5 |
| 1.8 | 1   | 2   | 0.045 | 0.044 | <b>0.044</b> | 0.045 | 20   | <b>0.044</b> | 0.045 | 64.8 | <b>0.044</b> | 0.045 | 68.1 | <b>0.044</b> | 0.045 | 67.9 |
| 1.8 | 1.2 | 2   | 0.045 | 0.045 | <b>0.044</b> | 0.045 | 24.5 | <b>0.044</b> | 0.045 | 60.8 | <b>0.044</b> | 0.045 | 64.2 | <b>0.044</b> | 0.045 | 64   |
| 1.8 | 1.4 | 2   | 0.045 | 0.045 | <b>0.043</b> | 0.045 | 29   | <b>0.043</b> | 0.045 | 56.5 | <b>0.043</b> | 0.045 | 58.6 | <b>0.043</b> | 0.045 | 58.8 |
| 1.8 | 1.6 | 2   | 0.045 | 0.045 | <b>0.043</b> | 0.045 | 31.8 | <b>0.043</b> | 0.045 | 48.5 | <b>0.043</b> | 0.045 | 49.5 | <b>0.043</b> | 0.045 | 49.7 |

**Table S4.  $d_{XY}$  between  $P_2$  and  $P_3$  for different sets of windows, for NULL MODELS**

The first two columns give the split times for the model in units of  $4N$  generations ago (see Fig. 4D). For each of the introgression statistics, there are two columns giving  $d_{XY}$  between  $P_2$  and  $P_3$  for outliers (windows with the top 10% of values), and non-outliers (the remaining 90% of windows). Highlighted blocks indicate cases where  $d_{XY}$  in the outlier windows was significantly lower than in the non-outlier windows.

|     |     | $D$          |             | $f_d$        |             | $f_G$        |             | $f_{hom}$    |             |
|-----|-----|--------------|-------------|--------------|-------------|--------------|-------------|--------------|-------------|
|     |     | outlier      | non-outlier | outlier      | non-outlier | outlier      | non-outlier | outlier      | non-outlier |
| 0.4 | 0.2 | <b>0.017</b> | 0.018       | <b>0.017</b> | 0.018       | <b>0.016</b> | 0.018       | <b>0.017</b> | 0.018       |
| 0.6 | 0.2 | <b>0.021</b> | 0.022       | <b>0.021</b> | 0.022       | <b>0.021</b> | 0.022       | <b>0.021</b> | 0.022       |
| 0.6 | 0.4 | <b>0.020</b> | 0.022       | <b>0.020</b> | 0.022       | <b>0.020</b> | 0.022       | <b>0.020</b> | 0.022       |
| 0.8 | 0.2 | <b>0.025</b> | 0.026       | <b>0.025</b> | 0.026       | <b>0.025</b> | 0.026       | <b>0.025</b> | 0.026       |
| 0.8 | 0.4 | <b>0.025</b> | 0.026       | <b>0.024</b> | 0.026       | <b>0.024</b> | 0.026       | <b>0.024</b> | 0.026       |
| 0.8 | 0.6 | <b>0.024</b> | 0.026       | <b>0.024</b> | 0.026       | <b>0.024</b> | 0.026       | <b>0.024</b> | 0.026       |
| 1   | 0.2 | <b>0.029</b> | 0.029       | <b>0.029</b> | 0.029       | <b>0.029</b> | 0.029       | <b>0.029</b> | 0.029       |
| 1   | 0.4 | <b>0.029</b> | 0.029       | <b>0.029</b> | 0.029       | <b>0.029</b> | 0.029       | <b>0.029</b> | 0.029       |
| 1   | 0.6 | <b>0.028</b> | 0.029       | <b>0.028</b> | 0.029       | <b>0.028</b> | 0.029       | <b>0.028</b> | 0.029       |
| 1   | 0.8 | <b>0.028</b> | 0.030       | <b>0.028</b> | 0.029       | <b>0.028</b> | 0.030       | <b>0.028</b> | 0.030       |
| 1.2 | 0.2 | 0.033        | 0.033       | <b>0.033</b> | 0.033       | <b>0.033</b> | 0.033       | <b>0.033</b> | 0.033       |
| 1.2 | 0.4 | <b>0.033</b> | 0.033       | <b>0.033</b> | 0.033       | <b>0.032</b> | 0.033       | <b>0.032</b> | 0.033       |
| 1.2 | 0.6 | <b>0.032</b> | 0.033       | <b>0.032</b> | 0.033       | <b>0.032</b> | 0.033       | <b>0.032</b> | 0.033       |
| 1.2 | 0.8 | <b>0.032</b> | 0.033       | <b>0.032</b> | 0.033       | <b>0.032</b> | 0.033       | <b>0.032</b> | 0.033       |
| 1.2 | 1   | <b>0.032</b> | 0.033       | <b>0.032</b> | 0.033       | <b>0.032</b> | 0.033       | <b>0.032</b> | 0.033       |
| 1.4 | 0.2 | 0.037        | 0.037       | <b>0.036</b> | 0.037       | <b>0.036</b> | 0.037       | <b>0.036</b> | 0.037       |
| 1.4 | 0.4 | <b>0.036</b> | 0.037       | <b>0.037</b> | 0.037       | <b>0.036</b> | 0.037       | <b>0.036</b> | 0.037       |
| 1.4 | 0.6 | <b>0.036</b> | 0.037       | <b>0.036</b> | 0.037       | <b>0.036</b> | 0.037       | <b>0.036</b> | 0.037       |
| 1.4 | 0.8 | <b>0.036</b> | 0.037       | <b>0.036</b> | 0.037       | <b>0.036</b> | 0.037       | <b>0.036</b> | 0.037       |
| 1.4 | 1.2 | <b>0.036</b> | 0.037       | <b>0.036</b> | 0.037       | <b>0.036</b> | 0.037       | <b>0.036</b> | 0.037       |
| 1.4 | 1   | <b>0.036</b> | 0.037       | <b>0.036</b> | 0.037       | <b>0.035</b> | 0.037       | <b>0.035</b> | 0.037       |
| 1.6 | 0.2 | <b>0.040</b> | 0.041       | <b>0.040</b> | 0.041       | <b>0.040</b> | 0.041       | <b>0.040</b> | 0.041       |
| 1.6 | 0.4 | <b>0.040</b> | 0.041       | <b>0.040</b> | 0.041       | <b>0.040</b> | 0.041       | <b>0.040</b> | 0.041       |
| 1.6 | 0.6 | <b>0.040</b> | 0.041       | <b>0.040</b> | 0.041       | <b>0.040</b> | 0.041       | <b>0.040</b> | 0.041       |
| 1.6 | 0.8 | <b>0.040</b> | 0.041       | <b>0.040</b> | 0.041       | <b>0.040</b> | 0.041       | <b>0.040</b> | 0.041       |
| 1.6 | 1.2 | <b>0.040</b> | 0.041       | <b>0.040</b> | 0.041       | <b>0.040</b> | 0.041       | <b>0.040</b> | 0.041       |
| 1.6 | 1.4 | <b>0.040</b> | 0.041       | <b>0.040</b> | 0.041       | <b>0.040</b> | 0.041       | <b>0.040</b> | 0.041       |
| 1.6 | 1   | <b>0.039</b> | 0.041       | <b>0.039</b> | 0.041       | <b>0.039</b> | 0.041       | <b>0.039</b> | 0.041       |
| 1.8 | 0.2 | 0.044        | 0.044       | <b>0.044</b> | 0.045       | <b>0.044</b> | 0.045       | <b>0.044</b> | 0.045       |
| 1.8 | 0.4 | 0.044        | 0.045       | 0.044        | 0.045       | <b>0.044</b> | 0.045       | 0.044        | 0.045       |
| 1.8 | 0.6 | <b>0.044</b> | 0.045       | <b>0.044</b> | 0.045       | <b>0.044</b> | 0.045       | <b>0.044</b> | 0.045       |
| 1.8 | 0.8 | <b>0.044</b> | 0.045       | <b>0.044</b> | 0.045       | <b>0.044</b> | 0.045       | <b>0.044</b> | 0.045       |
| 1.8 | 1.2 | <b>0.044</b> | 0.045       | <b>0.044</b> | 0.045       | <b>0.044</b> | 0.045       | <b>0.044</b> | 0.045       |
| 1.8 | 1.4 | <b>0.044</b> | 0.045       | <b>0.044</b> | 0.045       | <b>0.044</b> | 0.045       | <b>0.044</b> | 0.045       |
| 1.8 | 1.6 | <b>0.044</b> | 0.045       | <b>0.044</b> | 0.045       | <b>0.043</b> | 0.045       | <b>0.043</b> | 0.045       |
| 1.8 | 1   | <b>0.043</b> | 0.045       | <b>0.043</b> | 0.045       | <b>0.043</b> | 0.045       | <b>0.043</b> | 0.045       |
| 2   | 0.2 | 0.048        | 0.048       | <b>0.048</b> | 0.048       | <b>0.048</b> | 0.048       | <b>0.048</b> | 0.048       |
| 2   | 0.4 | 0.048        | 0.048       | <b>0.048</b> | 0.048       | <b>0.048</b> | 0.048       | <b>0.048</b> | 0.048       |
| 2   | 0.6 | <b>0.048</b> | 0.048       | <b>0.048</b> | 0.048       | <b>0.048</b> | 0.048       | <b>0.048</b> | 0.048       |
| 2   | 0.8 | <b>0.048</b> | 0.048       | <b>0.048</b> | 0.048       | <b>0.048</b> | 0.048       | <b>0.048</b> | 0.048       |
| 2   | 1.2 | <b>0.048</b> | 0.048       | <b>0.048</b> | 0.048       | <b>0.048</b> | 0.048       | <b>0.048</b> | 0.048       |

|     |     |              |       |              |       |              |       |              |       |
|-----|-----|--------------|-------|--------------|-------|--------------|-------|--------------|-------|
| 2   | 1.4 | <b>0.048</b> | 0.048 | <b>0.047</b> | 0.048 | <b>0.047</b> | 0.048 | <b>0.047</b> | 0.048 |
| 2   | 1.6 | <b>0.047</b> | 0.048 | <b>0.047</b> | 0.048 | <b>0.047</b> | 0.048 | <b>0.047</b> | 0.048 |
| 2   | 1.8 | <b>0.047</b> | 0.048 | <b>0.047</b> | 0.048 | <b>0.047</b> | 0.048 | <b>0.047</b> | 0.048 |
| 2   | 1   | <b>0.047</b> | 0.048 | <b>0.047</b> | 0.048 | <b>0.047</b> | 0.048 | <b>0.047</b> | 0.048 |
| 0.4 | 0.2 | <b>0.016</b> | 0.018 | <b>0.016</b> | 0.018 | <b>0.015</b> | 0.018 | <b>0.015</b> | 0.018 |
| 0.6 | 0.2 | <b>0.020</b> | 0.022 | <b>0.020</b> | 0.022 | <b>0.019</b> | 0.022 | <b>0.019</b> | 0.022 |
| 0.6 | 0.4 | <b>0.020</b> | 0.022 | <b>0.019</b> | 0.022 | <b>0.019</b> | 0.022 | <b>0.019</b> | 0.022 |
| 0.8 | 0.2 | <b>0.025</b> | 0.026 | <b>0.024</b> | 0.026 | <b>0.024</b> | 0.026 | <b>0.024</b> | 0.026 |
| 0.8 | 0.4 | <b>0.024</b> | 0.026 | <b>0.023</b> | 0.026 | <b>0.023</b> | 0.026 | <b>0.023</b> | 0.026 |
| 0.8 | 0.6 | <b>0.023</b> | 0.026 | <b>0.023</b> | 0.026 | <b>0.022</b> | 0.026 | <b>0.022</b> | 0.026 |
| 1   | 0.2 | <b>0.029</b> | 0.029 | <b>0.029</b> | 0.029 | <b>0.028</b> | 0.029 | <b>0.028</b> | 0.029 |
| 1   | 0.4 | <b>0.028</b> | 0.029 | <b>0.028</b> | 0.029 | <b>0.028</b> | 0.029 | <b>0.028</b> | 0.029 |
| 1   | 0.6 | <b>0.028</b> | 0.030 | <b>0.027</b> | 0.030 | <b>0.027</b> | 0.030 | <b>0.027</b> | 0.030 |
| 1   | 0.8 | <b>0.027</b> | 0.030 | <b>0.026</b> | 0.030 | <b>0.026</b> | 0.030 | <b>0.026</b> | 0.030 |
| 1.2 | 0.2 | 0.033        | 0.033 | <b>0.032</b> | 0.033 | <b>0.032</b> | 0.033 | <b>0.032</b> | 0.033 |
| 1.2 | 0.4 | <b>0.033</b> | 0.033 | <b>0.032</b> | 0.033 | <b>0.032</b> | 0.033 | <b>0.032</b> | 0.033 |
| 1.2 | 0.6 | <b>0.032</b> | 0.033 | <b>0.032</b> | 0.033 | <b>0.031</b> | 0.033 | <b>0.031</b> | 0.033 |
| 1.2 | 0.8 | <b>0.031</b> | 0.033 | <b>0.031</b> | 0.033 | <b>0.031</b> | 0.034 | <b>0.031</b> | 0.034 |
| 1.2 | 1   | <b>0.031</b> | 0.034 | <b>0.030</b> | 0.034 | <b>0.030</b> | 0.034 | <b>0.030</b> | 0.034 |
| 1.4 | 0.2 | 0.037        | 0.037 | <b>0.036</b> | 0.037 | <b>0.036</b> | 0.037 | <b>0.036</b> | 0.037 |
| 1.4 | 0.4 | 0.036        | 0.037 | <b>0.036</b> | 0.037 | <b>0.035</b> | 0.037 | <b>0.036</b> | 0.037 |
| 1.4 | 0.6 | <b>0.036</b> | 0.037 | <b>0.036</b> | 0.037 | <b>0.035</b> | 0.037 | <b>0.035</b> | 0.037 |
| 1.4 | 0.8 | <b>0.036</b> | 0.037 | <b>0.035</b> | 0.037 | <b>0.035</b> | 0.037 | <b>0.035</b> | 0.037 |
| 1.4 | 1.2 | <b>0.035</b> | 0.037 | <b>0.035</b> | 0.037 | <b>0.035</b> | 0.037 | <b>0.035</b> | 0.037 |
| 1.4 | 1   | <b>0.034</b> | 0.037 | <b>0.034</b> | 0.037 | <b>0.034</b> | 0.037 | <b>0.034</b> | 0.037 |
| 1.6 | 0.2 | 0.040        | 0.041 | <b>0.040</b> | 0.041 | <b>0.040</b> | 0.041 | <b>0.040</b> | 0.041 |
| 1.6 | 0.4 | 0.041        | 0.041 | <b>0.040</b> | 0.041 | <b>0.039</b> | 0.041 | <b>0.039</b> | 0.041 |
| 1.6 | 0.6 | 0.040        | 0.041 | <b>0.040</b> | 0.041 | <b>0.039</b> | 0.041 | <b>0.040</b> | 0.041 |
| 1.6 | 0.8 | <b>0.040</b> | 0.041 | <b>0.039</b> | 0.041 | <b>0.039</b> | 0.041 | <b>0.039</b> | 0.041 |
| 1.6 | 1.2 | <b>0.039</b> | 0.041 | <b>0.039</b> | 0.041 | <b>0.039</b> | 0.041 | <b>0.039</b> | 0.041 |
| 1.6 | 1.4 | <b>0.039</b> | 0.041 | <b>0.039</b> | 0.041 | <b>0.038</b> | 0.041 | <b>0.039</b> | 0.041 |
| 1.6 | 1   | <b>0.038</b> | 0.041 | <b>0.038</b> | 0.041 | <b>0.038</b> | 0.041 | <b>0.038</b> | 0.041 |
| 1.8 | 0.2 | <b>0.044</b> | 0.045 | <b>0.043</b> | 0.045 | <b>0.043</b> | 0.045 | <b>0.043</b> | 0.045 |
| 1.8 | 0.4 | 0.044        | 0.045 | <b>0.043</b> | 0.045 | <b>0.043</b> | 0.045 | <b>0.043</b> | 0.045 |
| 1.8 | 0.6 | 0.044        | 0.045 | <b>0.043</b> | 0.045 | <b>0.043</b> | 0.045 | <b>0.043</b> | 0.045 |
| 1.8 | 0.8 | 0.044        | 0.045 | <b>0.043</b> | 0.045 | <b>0.043</b> | 0.045 | <b>0.043</b> | 0.045 |
| 1.8 | 1.2 | <b>0.044</b> | 0.045 | <b>0.043</b> | 0.045 | <b>0.043</b> | 0.045 | <b>0.043</b> | 0.045 |
| 1.8 | 1.4 | <b>0.044</b> | 0.045 | <b>0.043</b> | 0.045 | <b>0.043</b> | 0.045 | <b>0.043</b> | 0.045 |
| 1.8 | 1.6 | <b>0.043</b> | 0.045 | <b>0.042</b> | 0.045 | <b>0.042</b> | 0.045 | <b>0.042</b> | 0.045 |
| 1.8 | 1   | <b>0.042</b> | 0.045 | <b>0.042</b> | 0.045 | <b>0.041</b> | 0.045 | <b>0.042</b> | 0.045 |
| 2   | 0.2 | 0.048        | 0.048 | <b>0.047</b> | 0.049 | <b>0.047</b> | 0.049 | <b>0.047</b> | 0.049 |
| 2   | 0.4 | 0.048        | 0.048 | <b>0.047</b> | 0.048 | <b>0.047</b> | 0.048 | <b>0.047</b> | 0.048 |
| 2   | 0.6 | 0.048        | 0.048 | <b>0.047</b> | 0.048 | <b>0.047</b> | 0.048 | <b>0.047</b> | 0.048 |
| 2   | 0.8 | <b>0.048</b> | 0.048 | <b>0.047</b> | 0.048 | <b>0.047</b> | 0.048 | <b>0.047</b> | 0.048 |
| 2   | 1.2 | 0.048        | 0.048 | <b>0.047</b> | 0.048 | <b>0.047</b> | 0.049 | <b>0.047</b> | 0.049 |
| 2   | 1.4 | <b>0.047</b> | 0.048 | <b>0.047</b> | 0.049 | <b>0.047</b> | 0.049 | <b>0.047</b> | 0.049 |
| 2   | 1.6 | <b>0.048</b> | 0.048 | <b>0.047</b> | 0.049 | <b>0.047</b> | 0.049 | <b>0.047</b> | 0.049 |
| 2   | 1.8 | <b>0.047</b> | 0.049 | <b>0.046</b> | 0.049 | <b>0.046</b> | 0.049 | <b>0.046</b> | 0.049 |
| 2   | 1   | <b>0.046</b> | 0.048 | <b>0.045</b> | 0.048 | <b>0.045</b> | 0.048 | <b>0.045</b> | 0.048 |
